# Supplementary material for: Stochastic Restricted Biased Estimators in Misspecified Regression Model with Incomplete Prior Information
Source: Hindawi journal article supplement (doi:10.1155/2018/1452181), 2018-01-01
Supplement: f1 [file 1452181.f1.pdf]

## Supplementary Material

### Appendix A: Lemmas

**Lemma A1:** (Trenkler and Toutenburg, 1990)

Let  $\hat{\beta}_1$  and  $\hat{\beta}_2$  be two linear estimator of  $\beta$ . Suppose that  $D = D(\hat{\beta}_1) - D(\hat{\beta}_2)$  is positive definite, then  $\Delta = MSEM(\hat{\beta}_1) - MSEM(\hat{\beta}_2)$  is non negative if and only if  $b'_2(D + b_1b'_1)^{-1}b_2 \leq 1$ , where  $D(\hat{\beta}_j)$ ,  $MSE(\hat{\beta}_j)$  and  $b_j$  denote dispersion matrix, mean square error matrix and bias vector of  $\hat{\beta}_j$  respectively,  $j = 1, 2$ .

**Lemma A2:** (Wang et al., 2006)

Let  $n \times n$  matrices  $M > 0, N \geq 0$ , then  $M > N$  if and only if  $\lambda_* < 1$ , where  $\lambda_*$  is the largest eigenvalue of the matrix  $NM^{-1}$ .

**Lemma A3:** (Baksalary and Kala, 1983)

Let  $B \geq 0$  of type  $n \times n$  matrix,  $b$  is a  $n \times 1$  vector and  $\lambda$  is a positive real number. Then the following conditions are equivalent.

- i.  $\lambda B - bb' \geq 0$
- ii.  $B \geq 0$ ,  $b \in \Re(B)$  and  $b'B^{-1}b \leq \lambda$ , where  $\Re(B)$  stands for column space of  $B$  and  $B^{-1}$  is a independent choice of g-inverse of  $B$ .

### Appendix B: Tables

**Table B1. Bias vector, Dispersion matrix and MSEM of the estimators**

| Estimators ( $\hat{\gamma}_{(j)}$ ) | $Bias(\hat{\gamma}_{(j)}), D(\hat{\gamma}_{(j)})$ and $MSEM(\hat{\gamma}_{(j)})$                                                                                                                                                                                                                                                                                  |
|-------------------------------------|-------------------------------------------------------------------------------------------------------------------------------------------------------------------------------------------------------------------------------------------------------------------------------------------------------------------------------------------------------------------|
| $\hat{\gamma}_{MRE}$                | $Bias(\hat{\gamma}_{MRE}) = \tau A$<br>$D(\hat{\gamma}_{MRE}) = \sigma^2 \tau$<br>$MSEM(\hat{\gamma}_{MRE}) = \sigma^2 \tau + (\tau A)(\tau A)'$                                                                                                                                                                                                                  |
| $\hat{\gamma}_{SRRE}$               | $Bias(\hat{\gamma}_{SRRE}) = (1+k)^{-1}(\tau A - k\gamma)$<br>$D(\hat{\gamma}_{SRRE}) = (1+k)^{-2}\sigma^2 \tau$<br>$MSEM(\hat{\gamma}_{SRRE}) = (1+k)^{-2}(\sigma^2 \tau + (\tau A - k\gamma)(\tau A - k\gamma)')$                                                                                                                                               |
| $\hat{\gamma}_{SRAURE}$             | $Bias(\hat{\gamma}_{SRAURE}) = (1+k)^{-2}((1+2k)\tau A - k^2\gamma)$<br>$D(\hat{\gamma}_{SRAURE}) = (1+k)^{-4}(1+2k)^2\sigma^2 \tau$<br>$MSEM(\hat{\gamma}_{SRAURE}) = (1+k)^{-4}((1+2k)^2\sigma^2 \tau + ((1+2k)\tau A - k^2\gamma)((1+2k)\tau A - k^2\gamma)')$                                                                                                 |
| $\hat{\gamma}_{SRLE}$               | $Bias(\hat{\gamma}_{SRLE}) = 2^{-1}((1+d)\tau A - (1-d)\gamma)$<br>$D(\hat{\gamma}_{SRLE}) = 2^{-2}(1+d)^2\sigma^2 \tau$<br>$MSEM(\hat{\gamma}_{SRLE}) = 2^{-2}((1+d)^2\sigma^2 \tau + ((1+d)\tau A - (1-d)\gamma)((1+d)\tau A - (1-d)\gamma)')$                                                                                                                  |
| $\hat{\gamma}_{SRAULE}$             | $Bias(\hat{\gamma}_{SRAULE}) = 2^{-2}((1+d)(3-d)\tau A - (1-d)^2\gamma)$<br>$D(\hat{\gamma}_{SRAULE}) = 2^{-4}(1+d)^2(3-d)^2\sigma^2 \tau$<br>$MSEM(\hat{\gamma}_{SRAULE}) = 2^{-4}((1+d)^2(3-d)^2\sigma^2 \tau + ((1+d)(3-d)\tau A - (1-d)^2\gamma)((1+d)(3-d)\tau A - (1-d)^2\gamma)')$                                                                         |
| $\hat{\gamma}_{SRPCR}$              | $Bias(\hat{\gamma}_{SRPCR}) = (T_h T_h' - I)\gamma + T_h T_h' \tau A$<br>$D(\hat{\gamma}_{SRPCR}) = \sigma^2 T_h T_h' \tau T_h' T_h$<br>$MSEM(\hat{\gamma}_{SRPCR}) = \sigma^2 T_h T_h' \tau T_h' T_h + ((T_h T_h' - I)\gamma + T_h T_h' \tau A)((T_h T_h' - I)\gamma + T_h T_h' \tau A)'$                                                                        |
| $\hat{\gamma}_{SRrk}$               | $Bias(\hat{\gamma}_{SRrk}) = (1+k)^{-1}((T_h T_h' - (1+k)I)\gamma + T_h T_h' \tau A)$<br>$D(\hat{\gamma}_{SRrk}) = (1+k)^{-2}\sigma^2 T_h T_h' \tau T_h' T_h$<br>$MSEM(\hat{\gamma}_{SRrk}) = (1+k)^{-2}(\sigma^2 T_h T_h' \tau T_h' T_h + ((T_h T_h' - (1+k)I)\gamma + T_h T_h' \tau A)((T_h T_h' - (1+k)I)\gamma + T_h T_h' \tau A)')$                          |
| $\hat{\gamma}_{SRrd}$               | $Bias(\hat{\gamma}_{SRrd}) = 2^{-1}(1+d)((T_h T_h' - 2(1+d)^{-1}I)\gamma + T_h T_h' \tau A)$<br>$D(\hat{\gamma}_{SRrd}) = 2^{-2}(1+d)^2\sigma^2 T_h T_h' \tau T_h' T_h$<br>$MSEM(\hat{\gamma}_{SRrd}) = 2^{-2}(1+d)^2(\sigma^2 T_h T_h' \tau T_h' T_h + ((T_h T_h' - 2(1+d)^{-1}I)\gamma + T_h T_h' \tau A)((T_h T_h' - 2(1+d)^{-1}I)\gamma + T_h T_h' \tau A)')$ |

**Table B2. Estimated SMSE values of the estimators**

| $k/d$                         | 0.1          | 0.2          | 0.3          | 0.4          | 0.5          | 0.6          | 0.7          | 0.8          | 0.9          |
|-------------------------------|--------------|--------------|--------------|--------------|--------------|--------------|--------------|--------------|--------------|
| $(l, p) = (4, 0)$             |              |              |              |              |              |              |              |              |              |
| $SMSE(\hat{\gamma}_{MRE})$    | <b>0.119</b> |
| $SMSE(\hat{\gamma}_{SRRE})$   | 0.545        | 1.672        | 3.174        | 4.860        | 6.621        | 8.388        | 10.124       | 11.805       | 13.420       |
| $SMSE(\hat{\gamma}_{SRAURE})$ | 0.116        | 0.142        | 0.246        | 0.456        | 0.777        | 1.206        | 1.729        | 2.333        | 3.002        |
| $SMSE(\hat{\gamma}_{SRLE})$   | 12.104       | 9.550        | 7.302        | 5.359        | 3.722        | 2.390        | 1.364        | 0.644        | 0.229        |
| $SMSE(\hat{\gamma}_{SRAULE})$ | 2.450        | 1.545        | 0.930        | 0.536        | 0.304        | 0.182        | 0.131        | 0.117        | 0.117        |
| $SMSE(\hat{\gamma}_{SRPCR})$  | 3.336        | 3.336        | 3.336        | 3.336        | 3.336        | 3.336        | 3.336        | 3.336        | 3.336        |
| $SMSE(\hat{\gamma}_{rk})$     | 3.695        | 4.731        | 6.131        | 7.713        | 9.369        | 11.035       | 12.674       | 14.263       | 15.791       |
| $SMSE(\hat{\gamma}_{rd})$     | 14.546       | 12.132       | 10.011       | 8.182        | 6.644        | 5.399        | 4.445        | 3.784        | 3.414        |
| $(l, p) = (3, 1)$             |              |              |              |              |              |              |              |              |              |
| $SMSE(\hat{\gamma}_{MRE})$    | 2.974        | 2.974        | 2.974        | 2.974        | 2.974        | 2.974        | 2.974        | 2.974        | 2.974        |
| $SMSE(\hat{\gamma}_{SRRE})$   | 1.171        | <b>0.395</b> | <b>0.255</b> | <b>0.511</b> | 1.014        | 1.668        | 2.411        | 3.202        | 4.014        |
| $SMSE(\hat{\gamma}_{SRAURE})$ | 2.771        | 2.323        | 1.803        | 1.312        | 0.900        | 0.588        | <b>0.379</b> | <b>0.269</b> | <b>0.248</b> |
| $SMSE(\hat{\gamma}_{SRLE})$   | 3.349        | 2.156        | 1.251        | 0.634        | <b>0.305</b> | <b>0.263</b> | 0.509        | 1.043        | 1.865        |
| $SMSE(\hat{\gamma}_{SRAULE})$ | <b>0.259</b> | 0.437        | 0.767        | 1.185        | 1.633        | 2.064        | 2.440        | 2.730        | 2.912        |
| $SMSE(\hat{\gamma}_{SRPCR})$  | 13.712       | 13.712       | 13.712       | 13.712       | 13.712       | 13.712       | 13.712       | 13.712       | 13.712       |
| $SMSE(\hat{\gamma}_{rk})$     | 13.273       | 13.276       | 13.541       | 13.959       | 14.464       | 15.015       | 15.586       | 16.159       | 16.725       |
| $SMSE(\hat{\gamma}_{rd})$     | 16.263       | 15.395       | 14.673       | 14.097       | 13.667       | 13.384       | 13.247       | 13.256       | 13.411       |
| $(l, p) = (2, 2)$             |              |              |              |              |              |              |              |              |              |
| $SMSE(\hat{\gamma}_{MRE})$    | 8.499        | 8.499        | 8.499        | 8.499        | 8.499        | 8.499        | 8.499        | 8.499        | 8.499        |
| $SMSE(\hat{\gamma}_{SRRE})$   | 4.873        | 2.617        | 1.251        | 0.477        | <b>0.102</b> | <b>0.001</b> | <b>0.085</b> | <b>0.297</b> | <b>0.598</b> |
| $SMSE(\hat{\gamma}_{SRAURE})$ | 8.128        | 7.285        | 6.253        | 5.197        | 4.203        | 3.314        | 2.544        | 1.897        | 1.365        |
| $SMSE(\hat{\gamma}_{SRLE})$   | <b>0.347</b> | <b>0.040</b> | <b>0.036</b> | <b>0.336</b> | 0.938        | 1.844        | 3.053        | 4.565        | 6.381        |
| $SMSE(\hat{\gamma}_{SRAULE})$ | 1.792        | 2.787        | 3.847        | 4.904        | 5.898        | 6.780        | 7.508        | 8.051        | 8.386        |
| $SMSE(\hat{\gamma}_{SRPCR})$  | 12.232       | 12.232       | 12.232       | 12.232       | 12.232       | 12.232       | 12.232       | 12.232       | 12.232       |
| $SMSE(\hat{\gamma}_{rk})$     | 12.916       | 13.542       | 14.111       | 14.627       | 15.095       | 15.521       | 15.910       | 16.265       | 16.591       |
| $SMSE(\hat{\gamma}_{rd})$     | 16.326       | 15.784       | 15.264       | 14.765       | 14.288       | 13.834       | 13.400       | 12.989       | 12.599       |

**Table B3. Estimated SMSE values of the predictors**

| $k/d$                    | 0.1           | 0.2           | 0.3           | 0.4           | 0.5           | 0.6           | 0.7           | 0.8           | 0.9           |
|--------------------------|---------------|---------------|---------------|---------------|---------------|---------------|---------------|---------------|---------------|
| $(l, p) = (4, 0)$        |               |               |               |               |               |               |               |               |               |
| $SMSE(\hat{y}_{MRE})$    | 7954.9        | 7954.9        | 7954.9        | 7954.9        | 7954.9        | 7954.9        | 7954.9        | 7954.9        | 7954.9        |
| $SMSE(\hat{y}_{SRRE})$   | 6460.6        | 5334.0        | 4464.9        | 3781.5        | <b>3235.0</b> | <b>2791.9</b> | <b>2428.0</b> | <b>2125.8</b> | <b>1872.5</b> |
| $SMSE(\hat{y}_{SRAURE})$ | 7812.7        | 7481.8        | 7060.7        | 6606.0        | 6149.6        | 5709.1        | 5293.2        | 4905.9        | 4548.1        |
| $SMSE(\hat{y}_{SRLE})$   | <b>2076.5</b> | <b>2541.7</b> | <b>3053.8</b> | <b>3613.0</b> | 4219.3        | 4872.4        | 5572.6        | 6319.7        | 7113.8        |
| $SMSE(\hat{y}_{SRAULE})$ | 4838.6        | 5428.8        | 5977.7        | 6474.8        | 6910.9        | 7278.3        | 7570.6        | 7783.0        | 7911.8        |
| $SMSE(\hat{y}_{SRPCR})$  | 7954.8        | 7954.8        | 7954.8        | 7954.8        | 7954.8        | 7954.8        | 7954.8        | 7954.8        | 7954.8        |
| $SMSE(\hat{y}_{SRrk})$   | 6460.5        | 5333.9        | 4464.8        | 3781.4        | 3235.1        | 2790.0        | 2428.1        | 2125.9        | 1872.6        |
| $SMSE(\hat{y}_{SRrd})$   | 2076.6        | 2541.8        | 3053.9        | 3613.1        | 4219.2        | 4872.3        | 5572.5        | 6319.6        | 7113.7        |
| $(l, p) = (3, 1)$        |               |               |               |               |               |               |               |               |               |
| $SMSE(\hat{y}_{MRE})$    | 3496.8        | 3496.8        | 3496.8        | 3496.8        | 3496.8        | 3496.8        | 3496.8        | 3496.8        | 3496.8        |
| $SMSE(\hat{y}_{SRRE})$   | 2966.2        | 2557.4        | 2235.1        | 1976.2        | <b>1764.7</b> | <b>1589.4</b> | <b>1442.4</b> | <b>1317.7</b> | <b>1210.9</b> |
| $SMSE(\hat{y}_{SRAURE})$ | 3446.7        | 3330.0        | 3180.7        | 3018.3        | 2854.2        | 2694.5        | 2542.4        | 2399.5        | 2266.3        |
| $SMSE(\hat{y}_{SRLE})$   | <b>1297.0</b> | <b>1488.7</b> | <b>1693.5</b> | <b>1911.5</b> | 2142.7        | 2387.1        | 2644.7        | 2915.5        | 3199.5        |
| $SMSE(\hat{y}_{SRAULE})$ | 2374.6        | 2592.1        | 2792.0        | 2971.3        | 3127.3        | 3257.9        | 3361.4        | 3436.3        | 3481.6        |
| $SMSE(\hat{y}_{SRPCR})$  | 5417.8        | 5417.8        | 5417.8        | 5417.8        | 5417.8        | 5417.8        | 5417.8        | 5417.8        | 5417.8        |
| $SMSE(\hat{y}_{SRrk})$   | 4572.5        | 3922.8        | 3412.0        | 3002.4        | 2668.7        | 2392.8        | 2161.8        | 1966.4        | 1799.3        |
| $SMSE(\hat{y}_{SRrd})$   | 1934.1        | 2234.4        | 2556.5        | 2900.2        | 3265.6        | 3652.7        | 4061.5        | 4491.9        | 4944.0        |
| $(l, p) = (2, 2)$        |               |               |               |               |               |               |               |               |               |
| $SMSE(\hat{y}_{MRE})$    | 4864.5        | 4864.5        | 4864.5        | 4864.5        | 4864.5        | 4864.5        | 4864.5        | 4864.5        | 4864.5        |
| $SMSE(\hat{y}_{SRRE})$   | 4110.3        | 3530.3        | 3073.9        | 2707.9        | 2409.5        | 2162.6        | 1955.9        | 1780.8        | 1631.1        |
| $SMSE(\hat{y}_{SRAURE})$ | 4793.3        | 4627.3        | 4415.0        | 4184.3        | 3951.3        | 3724.7        | 3509.1        | 3306.6        | 3118.0        |
| $SMSE(\hat{y}_{SRLE})$   | 1751.9        | 2020.9        | 2309.1        | 2616.5        | 2943.2        | 3289.0        | 3654.1        | 4038.3        | 4441.8        |
| $SMSE(\hat{y}_{SRAULE})$ | 3271.3        | 3579.5        | 3863.0        | 4117.5        | 4339.1        | 4524.8        | 4671.9        | 4778.4        | 4842.9        |
| $SMSE(\hat{y}_{SRPCR})$  | 847.0         | 847.0         | 847.0         | 847.0         | 847.0         | 847.0         | 847.0         | 847.0         | 847.0         |
| $SMSE(\hat{y}_{SRrk})$   | 737.8         | 652.6         | 584.6         | 529.3         | <b>483.6</b>  | <b>445.3</b>  | <b>412.8</b>  | <b>385.0</b>  | <b>360.9</b>  |
| $SMSE(\hat{y}_{SRrd})$   | <b>380.3</b>  | <b>423.1</b>  | <b>468.1</b>  | <b>515.4</b>  | 565.0         | 616.8         | 670.9         | 727.3         | 786.0         |

**Table B4. Estimated SMSE values of the estimators when n = 50 and  $\rho = 0.9$**

| k/d                           | 0.1          | 0.2          | 0.3          | 0.4           | 0.5          | 0.6          | 0.7          | 0.8          | 0.9          |
|-------------------------------|--------------|--------------|--------------|---------------|--------------|--------------|--------------|--------------|--------------|
| $(l, p) = (3, 0)$             |              |              |              |               |              |              |              |              |              |
| $SMSE(\hat{\gamma}_{MRE})$    | <b>5.73</b>  | <b>5.73</b>  | <b>5.73</b>  | <b>5.73</b>   | <b>5.73</b>  | <b>5.73</b>  | <b>5.73</b>  | 5.73         | 5.73         |
| $SMSE(\hat{\gamma}_{SRRE})$   | 7.38         | 12.01        | 18.23        | 25.25         | 32.60        | 39.98        | 47.23        | 54.27        | 61.03        |
| $SMSE(\hat{\gamma}_{SRAURE})$ | 5.70         | 5.78         | 6.18         | 7.01          | 8.32         | 10.08        | 12.24        | 14.74        | 17.52        |
| $SMSE(\hat{\gamma}_{SRLE})$   | 55.52        | 44.84        | 35.44        | 27.33         | 20.51        | 14.98        | 10.74        | 7.78         | 6.11         |
| $SMSE(\hat{\gamma}_{SRAULE})$ | 15.23        | 11.48        | 8.95         | 7.34          | 6.40         | 5.93         | 5.74         | <b>5.70</b>  | <b>5.71</b>  |
| $SMSE(\hat{\gamma}_{SRPCR})$  | 165.01       | 165.01       | 165.01       | 165.01        | 165.01       | 165.01       | 165.01       | 165.01       | 165.01       |
| $SMSE(\hat{\gamma}_{SRrk})$   | 165.18       | 166.59       | 168.68       | 171.13        | 173.74       | 176.40       | 179.04       | 181.60       | 184.08       |
| $SMSE(\hat{\gamma}_{SRrd})$   | 182.06       | 178.16       | 174.76       | 171.87        | 169.47       | 167.58       | 166.18       | 165.29       | 164.90       |
| $(l, p) = (4, 1)$             |              |              |              |               |              |              |              |              |              |
| $SMSE(\hat{\gamma}_{MRE})$    | 31.497       | 31.497       | 31.497       | 31.497        | 31.497       | 31.497       | 31.497       | 31.497       | 31.497       |
| $SMSE(\hat{\gamma}_{SRRE})$   | 17.883       | 9.773        | 5.207        | 2.969         | <b>2.280</b> | <b>2.631</b> | <b>3.679</b> | <b>5.192</b> | 7.009        |
| $SMSE(\hat{\gamma}_{SRAURE})$ | 30.085       | 26.888       | 23.008       | 19.078        | 15.433       | 12.229       | 9.522        | 7.312        | <b>5.568</b> |
| $SMSE(\hat{\gamma}_{SRLE})$   | <b>5.503</b> | <b>3.268</b> | <b>2.314</b> | <b>2.640</b>  | 4.248        | 7.136        | 11.305       | 16.755       | 23.486       |
| $SMSE(\hat{\gamma}_{SRAULE})$ | 6.961        | 10.369       | 14.144       | 17.998        | 21.683       | 24.985       | 27.733       | 29.792       | 31.066       |
| $SMSE(\hat{\gamma}_{SRPCR})$  | 44.136       | 44.136       | 44.136       | 44.136        | 44.136       | 44.136       | 44.136       | 44.136       | 44.136       |
| $SMSE(\hat{\gamma}_{SRrk})$   | 37.801       | 34.469       | 33.032       | 32.809        | 33.368       | 34.431       | 35.814       | 37.393       | 39.085       |
| $SMSE(\hat{\gamma}_{SRrd})$   | 37.694       | 35.326       | 33.729       | 32.903        | 32.848       | 33.563       | 35.050       | 37.308       | 40.336       |
| $(l, p) = (2, 2)$             |              |              |              |               |              |              |              |              |              |
| $SMSE(\hat{\gamma}_{MRE})$    | 61.869       | 61.869       | 61.869       | 61.869        | 61.869       | 61.869       | 61.869       | 61.869       | 61.869       |
| $SMSE(\hat{\gamma}_{SRRE})$   | 41.520       | 27.719       | 18.282       | 11.828        | <b>7.455</b> | <b>4.559</b> | <b>2.724</b> | <b>1.661</b> | <b>1.161</b> |
| $SMSE(\hat{\gamma}_{SRAURE})$ | 59.848       | 55.213       | 49.447       | 43.407        | 37.559       | 32.139       | 27.250       | 22.918       | 19.130       |
| $SMSE(\hat{\gamma}_{SRLE})$   | <b>1.533</b> | <b>3.238</b> | <b>6.192</b> | <b>10.397</b> | 15.851       | 22.555       | 30.509       | 39.712       | 50.166       |
| $SMSE(\hat{\gamma}_{SRAULE})$ | 22.190       | 28.818       | 35.416       | 41.703        | 47.435       | 52.406       | 56.448       | 59.428       | 61.254       |
| $SMSE(\hat{\gamma}_{SRPCR})$  | 38.090       | 38.090       | 38.090       | 38.090        | 38.090       | 38.090       | 38.090       | 38.090       | 38.090       |
| $SMSE(\hat{\gamma}_{SRrk})$   | 34.346       | 32.175       | 31.013       | 30.508        | 30.438       | 30.657       | 31.066       | 31.601       | 32.216       |
| $SMSE(\hat{\gamma}_{SRrd})$   | 31.708       | 30.913       | 30.494       | 30.451        | 30.784       | 31.493       | 32.579       | 34.040       | 35.877       |

**Table B5. Estimated SMSE values of the estimators when  $n = 50$  and  $\rho = 0.99$**

| k/d                      | 0.1          | 0.2          | 0.3          | 0.4          | 0.5          | 0.6          | 0.7          | 0.8          | 0.9          |
|--------------------------|--------------|--------------|--------------|--------------|--------------|--------------|--------------|--------------|--------------|
| $(l, p) = (5, 0)$        |              |              |              |              |              |              |              |              |              |
| $SMSE(\hat{Y}_{MRE})$    | 5.89         | 5.89         | <b>5.89</b>  | <b>5.89</b>  | <b>5.89</b>  | <b>5.89</b>  | 5.89         | 5.89         | 5.89         |
| $SMSE(\hat{Y}_{SRRE})$   | 7.38         | 11.93        | 18.13        | 25.16        | 32.54        | 39.97        | 47.29        | 54.38        | 61.21        |
| $SMSE(\hat{Y}_{SRAURE})$ | <b>5.84</b>  | <b>5.88</b>  | 6.23         | 7.02         | 8.29         | 10.02        | 12.16        | 14.65        | 17.42        |
| $SMSE(\hat{Y}_{SRLE})$   | 55.65        | 44.87        | 35.41        | 27.25        | 20.41        | 14.88        | 10.67        | 7.76         | 6.17         |
| $SMSE(\hat{Y}_{SRAULE})$ | 15.13        | 11.41        | 8.91         | 7.34         | 6.44         | 6.01         | <b>5.85</b>  | <b>5.84</b>  | <b>5.87</b>  |
| $SMSE(\hat{Y}_{SRPCR})$  | 195.79       | 195.79       | 195.79       | 195.79       | 195.79       | 195.79       | 195.79       | 195.79       | 195.79       |
| $SMSE(\hat{Y}_{SRrk})$   | 195.66       | 196.47       | 197.82       | 199.45       | 201.22       | 203.04       | 204.85       | 206.63       | 208.36       |
| $SMSE(\hat{Y}_{SRrd})$   | 206.95       | 204.25       | 201.91       | 199.94       | 198.34       | 197.10       | 196.22       | 195.71       | 195.57       |
| $(l, p) = (4, 1)$        |              |              |              |              |              |              |              |              |              |
| $SMSE(\hat{Y}_{MRE})$    | 19.939       | 19.939       | 19.939       | 19.939       | 19.939       | 19.939       | 19.939       | 19.939       | 19.939       |
| $SMSE(\hat{Y}_{SRRE})$   | 10.064       | <b>5.145</b> | <b>3.333</b> | <b>3.494</b> | 4.914        | 7.131        | 9.844        | 12.850       | 16.014       |
| $SMSE(\hat{Y}_{SRAURE})$ | 18.862       | 16.462       | 13.629       | 10.873       | 8.458        | 6.497        | <b>5.017</b> | <b>4.004</b> | <b>3.417</b> |
| $SMSE(\hat{Y}_{SRLE})$   | 13.416       | 8.899        | 5.691        | 3.795        | <b>3.209</b> | <b>3.934</b> | 5.969        | 9.315        | 13.972       |
| $SMSE(\hat{Y}_{SRAULE})$ | <b>3.866</b> | 5.457        | 7.647        | 10.142       | 12.685       | 15.060       | 17.091       | 18.640       | 19.609       |
| $SMSE(\hat{Y}_{SRPCR})$  | 47.194       | 47.194       | 47.194       | 47.194       | 47.194       | 47.194       | 47.194       | 47.194       | 47.194       |
| $SMSE(\hat{Y}_{SRrk})$   | 42.791       | 41.218       | 41.373       | 42.592       | 44.459       | 46.710       | 49.175       | 51.742       | 54.339       |
| $SMSE(\hat{Y}_{SRrd})$   | 52.213       | 48.337       | 45.290       | 43.073       | 41.686       | 41.128       | 41.400       | 42.502       | 44.433       |
| $(l, p) = (3, 2)$        |              |              |              |              |              |              |              |              |              |
| $SMSE(\hat{Y}_{MRE})$    | 49.955       | 49.955       | 49.955       | 49.955       | 49.955       | 49.955       | 49.955       | 49.955       | 49.955       |
| $SMSE(\hat{Y}_{SRRE})$   | 31.645       | 19.652       | 11.823       | 6.804        | <b>3.718</b> | <b>1.979</b> | <b>1.190</b> | <b>1.076</b> | <b>1.443</b> |
| $SMSE(\hat{Y}_{SRAURE})$ | 48.113       | 43.906       | 38.710       | 33.317       | 28.157       | 23.440       | 19.254       | 15.617       | 12.509       |
| $SMSE(\hat{Y}_{SRLE})$   | <b>1.112</b> | <b>1.367</b> | <b>2.914</b> | <b>5.755</b> | 9.889        | 15.316       | 22.036       | 30.049       | 39.355       |
| $SMSE(\hat{Y}_{SRAULE})$ | 15.014       | 20.589       | 26.283       | 31.807       | 36.908       | 41.372       | 45.025       | 47.731       | 49.394       |
| $SMSE(\hat{Y}_{SRPCR})$  | 44.297       | 44.297       | 44.297       | 44.297       | 44.297       | 44.297       | 44.297       | 44.297       | 44.297       |
| $SMSE(\hat{Y}_{SRrk})$   | 40.730       | 38.850       | 38.034       | 37.900       | 38.206       | 38.796       | 39.565       | 40.445       | 41.389       |
| $SMSE(\hat{Y}_{SRrd})$   | 40.613       | 39.293       | 38.406       | 37.951       | 37.928       | 38.337       | 39.179       | 40.452       | 42.158       |

**Table B6. Estimated SMSE values of the estimators when  $n = 50$  and  $\rho = 0.999$**

| k/d                           | 0.1          | 0.2          | 0.3          | 0.4          | 0.5          | 0.6          | 0.7          | 0.8          | 0.9          |
|-------------------------------|--------------|--------------|--------------|--------------|--------------|--------------|--------------|--------------|--------------|
| $(l, p) = (5, 0)$             |              |              |              |              |              |              |              |              |              |
| $SMSE(\hat{\gamma}_{MRE})$    | <b>2.39</b>  |
| $SMSE(\hat{\gamma}_{SRRE})$   | 4.52         | 9.46         | 15.90        | 23.06        | 30.49        | 37.93        | 45.21        | 52.26        | 59.02        |
| $SMSE(\hat{\gamma}_{SRAURE})$ | 2.41         | 2.60         | 3.13         | 4.11         | 5.55         | 7.44         | 9.71         | 12.30        | 15.16        |
| $SMSE(\hat{\gamma}_{SRLE})$   | 53.51        | 42.81        | 33.36        | 25.17        | 18.23        | 12.55        | 8.13         | 4.96         | 3.05         |
| $SMSE(\hat{\gamma}_{SRAULE})$ | 12.80        | 8.91         | 6.23         | 4.47         | 3.41         | 2.81         | 2.53         | 2.42         | 2.40         |
| $SMSE(\hat{\gamma}_{SRPCR})$  | 196.31       | 196.31       | 196.31       | 196.31       | 196.31       | 196.31       | 196.31       | 196.31       | 196.31       |
| $SMSE(\hat{\gamma}_{SRrk})$   | 196.66       | 197.70       | 199.12       | 200.72       | 202.39       | 204.08       | 205.74       | 207.35       | 208.90       |
| $SMSE(\hat{\gamma}_{SRrd})$   | 207.64       | 205.19       | 203.05       | 201.19       | 199.64       | 198.38       | 197.41       | 196.75       | 196.38       |
| $(l, p) = (4, 1)$             |              |              |              |              |              |              |              |              |              |
| $SMSE(\hat{\gamma}_{MRE})$    | 13.160       | 13.160       | 13.160       | 13.160       | 13.160       | 13.160       | 13.160       | 13.160       | 13.160       |
| $SMSE(\hat{\gamma}_{SRRE})$   | 5.343        | <b>2.031</b> | <b>1.501</b> | <b>2.706</b> | 4.988        | 7.929        | 11.255       | 14.786       | 18.405       |
| $SMSE(\hat{\gamma}_{SRAURE})$ | 12.276       | 10.327       | 8.073        | 5.949        | 4.176        | 2.841        | <b>1.962</b> | <b>1.516</b> | <b>1.461</b> |
| $SMSE(\hat{\gamma}_{SRLE})$   | 15.440       | 10.116       | 6.059        | 3.270        | <b>1.749</b> | <b>1.496</b> | 2.510        | 4.792        | 8.342        |
| $SMSE(\hat{\gamma}_{SRAULE})$ | <b>1.478</b> | 2.206        | 3.608        | 5.401        | 7.336        | 9.204        | 10.835       | 12.095       | 12.889       |
| $SMSE(\hat{\gamma}_{SRPCR})$  | 45.790       | 45.790       | 45.790       | 45.790       | 45.790       | 45.790       | 45.790       | 45.790       | 45.790       |
| $SMSE(\hat{\gamma}_{SRrk})$   | 42.368       | 41.593       | 42.412       | 44.190       | 46.535       | 49.198       | 52.022       | 54.906       | 57.784       |
| $SMSE(\hat{\gamma}_{SRrd})$   | 55.431       | 51.070       | 47.532       | 44.815       | 42.922       | 41.850       | 41.602       | 42.175       | 43.571       |
| $(l, p) = (3, 2)$             |              |              |              |              |              |              |              |              |              |
| $SMSE(\hat{\gamma}_{MRE})$    | 42.748       | 42.748       | 42.748       | 42.748       | 42.748       | 42.748       | 42.748       | 42.748       | 42.748       |
| $SMSE(\hat{\gamma}_{SRRE})$   | 26.110       | 15.416       | 8.618        | 4.435        | <b>2.035</b> | <b>0.870</b> | <b>0.566</b> | <b>0.866</b> | <b>1.589</b> |
| $SMSE(\hat{\gamma}_{SRAURE})$ | 41.064       | 37.224       | 32.498       | 27.618       | 22.976       | 18.767       | 15.066       | 11.885       | 9.204        |
| $SMSE(\hat{\gamma}_{SRLE})$   | <b>0.971</b> | <b>0.590</b> | <b>1.465</b> | <b>3.595</b> | 6.982        | 11.624       | 17.521       | 24.675       | 33.084       |
| $SMSE(\hat{\gamma}_{SRAULE})$ | 11.362       | 16.241       | 21.300       | 26.256       | 30.864       | 34.916       | 38.244       | 40.715       | 42.235       |
| $SMSE(\hat{\gamma}_{SRPCR})$  | 44.641       | 44.641       | 44.641       | 44.641       | 44.641       | 44.641       | 44.641       | 44.641       | 44.641       |
| $SMSE(\hat{\gamma}_{SRrk})$   | 41.468       | 39.910       | 39.365       | 39.461       | 39.965       | 40.726       | 41.646       | 42.659       | 43.722       |
| $SMSE(\hat{\gamma}_{SRrd})$   | 42.850       | 41.326       | 40.233       | 39.571       | 39.339       | 39.538       | 40.168       | 41.229       | 42.720       |

**Table B7. Estimated SMSE values of the predictors when  $n = 50$  and  $\rho = 0.9$** 

| k/d                      | 0.1         | 0.2          | 0.3          | 0.4          | 0.5          | 0.6          | 0.7         | 0.8         | 0.9         |
|--------------------------|-------------|--------------|--------------|--------------|--------------|--------------|-------------|-------------|-------------|
| $(l, p) = (5, 0)$        |             |              |              |              |              |              |             |             |             |
| $SMSE(\hat{Y}_{MRE})$    | 26713       | 26713        | 26713        | 26713        | 26713        | 26713        | 26713       | 26713       | 26713       |
| $SMSE(\hat{Y}_{SRRE})$   | 22354       | 19021        | 16413        | 14333        | 12646        | 11258        | 10101       | 9127        | 8298        |
| $SMSE(\hat{Y}_{SRAURE})$ | 26300       | 25340        | 24112        | 22781        | 21439        | 20136        | 18900       | 17741       | 16665       |
| $SMSE(\hat{Y}_{SRLE})$   | 8966        | 10464        | 12081        | 13816        | 15669        | 17641        | 19731       | 21940       | 24267       |
| $SMSE(\hat{Y}_{SRAULE})$ | 17540       | 19304        | 20931        | 22396        | 23674        | 24747        | 25598       | 26214       | 26588       |
| $SMSE(\hat{Y}_{SRPCR})$  | 26257       | 26257        | 26257        | 26257        | 26257        | 26257        | 26257       | 26257       | 26257       |
| $SMSE(\hat{Y}_{SRrk})$   | 21978       | 18705        | 16144        | 14101        | <b>12444</b> | <b>11080</b> | <b>9944</b> | <b>8987</b> | <b>8172</b> |
| $SMSE(\hat{Y}_{SRrd})$   | <b>8829</b> | <b>10301</b> | <b>11889</b> | <b>13593</b> | 15413        | 17350        | 19402       | 21571       | 23856       |
| $(l, p) = (4, 1)$        |             |              |              |              |              |              |             |             |             |
| $SMSE(\hat{Y}_{MRE})$    | 16251       | 16251        | 16251        | 16251        | 16251        | 16251        | 16251       | 16251       | 16251       |
| $SMSE(\hat{Y}_{SRRE})$   | 13669       | 11690        | 10139        | 8898         | 7891         | 7060         | 6366        | 5781        | 5282        |
| $SMSE(\hat{Y}_{SRAURE})$ | 16007       | 15438        | 14711        | 13922        | 13126        | 12352        | 11618       | 10929       | 10288       |
| $SMSE(\hat{Y}_{SRLE})$   | 5684        | 6584         | 7553         | 8590         | 9695         | 10869        | 12112       | 13423       | 14803       |
| $SMSE(\hat{Y}_{SRAULE})$ | 10809       | 11858        | 12824        | 13693        | 14451        | 15087        | 15591       | 15956       | 16177       |
| $SMSE(\hat{Y}_{SRPCR})$  | 8636        | 8636         | 8636         | 8636         | 8636         | 8636         | 8636        | 8636        | 8636        |
| $SMSE(\hat{Y}_{SRrk})$   | 7314        | 6299         | 5502         | 4863         | <b>4342</b>  | <b>3912</b>  | <b>3552</b> | <b>3248</b> | <b>2988</b> |
| $SMSE(\hat{Y}_{SRrd})$   | <b>3198</b> | <b>3666</b>  | <b>4167</b>  | <b>4703</b>  | 5273         | 5877         | 6516        | 7188        | 7895        |
| $(l, p) = (3, 2)$        |             |              |              |              |              |              |             |             |             |
| $SMSE(\hat{Y}_{MRE})$    | 14936       | 14936        | 14936        | 14936        | 14936        | 14936        | 14936       | 14936       | 14936       |
| $SMSE(\hat{Y}_{SRRE})$   | 12511       | 10657        | 9207         | 8051         | 7114         | 6344         | 5702        | 5161        | 4702        |
| $SMSE(\hat{Y}_{SRAURE})$ | 14707       | 14172        | 13489        | 12748        | 12002        | 11277        | 10590       | 9945        | 9347        |
| $SMSE(\hat{Y}_{SRLE})$   | 5072        | 5903         | 6800         | 7764         | 8794         | 9890         | 11052       | 12280       | 13575       |
| $SMSE(\hat{Y}_{SRAULE})$ | 9833        | 10814        | 11719        | 12534        | 13245        | 13842        | 14316       | 14659       | 14867       |
| $SMSE(\hat{Y}_{SRPCR})$  | 5972        | 5972         | 5972         | 5972         | 5972         | 5972         | 5972        | 5972        | 5972        |
| $SMSE(\hat{Y}_{SRrk})$   | 5054        | 4350         | 3799         | 3358         | <b>3000</b>  | <b>2705</b>  | <b>2458</b> | <b>2250</b> | <b>2073</b> |
| $SMSE(\hat{Y}_{SRrd})$   | <b>2216</b> | <b>2536</b>  | <b>2880</b>  | <b>3248</b>  | 3641         | 4059         | 4500        | 4966        | 5457        |



**Table B8. Estimated SMSE values of the predictors when  $n = 50$  and  $\rho = 0.99$**

| k/d                      | 0.1         | 0.2         | 0.3         | 0.4          | 0.5         | 0.6         | 0.7         | 0.8         | 0.9         |
|--------------------------|-------------|-------------|-------------|--------------|-------------|-------------|-------------|-------------|-------------|
| $(l, p) = (5, 0)$        |             |             |             |              |             |             |             |             |             |
| $SMSE(\hat{y}_{MRE})$    | 20010       | 20010       | 20010       | 20010        | 20010       | 20010       | 20010       | 20010       | 20010       |
| $SMSE(\hat{y}_{SRRE})$   | 16798       | 14337       | 12410       | 10871        | 9620        | 8591        | 7731        | 7007        | 6390        |
| $SMSE(\hat{y}_{SRAURE})$ | 19707       | 18999       | 18094       | 17112        | 16122       | 15161       | 14248       | 13392       | 12596       |
| $SMSE(\hat{y}_{SRLE})$   | 6887        | 8001        | 9201        | 10487        | 11859       | 13318       | 14862       | 16492       | 18208       |
| $SMSE(\hat{y}_{SRAULE})$ | 13243       | 14546       | 15748       | 16828        | 17771       | 18562       | 19189       | 19643       | 19918       |
| $SMSE(\hat{y}_{SRPCR})$  | 19969       | 19969       | 19969       | 19969        | 19969       | 19969       | 19969       | 19969       | 19969       |
| $SMSE(\hat{y}_{SRrk})$   | 16763       | 14309       | 12386       | 10849        | <b>9602</b> | <b>8574</b> | <b>7717</b> | <b>6994</b> | <b>6378</b> |
| $SMSE(\hat{y}_{SRrd})$   | <b>6875</b> | <b>7986</b> | <b>9184</b> | <b>10467</b> | 11836       | 13291       | 14832       | 16458       | 18171       |
| $(l, p) = (4, 1)$        |             |             |             |              |             |             |             |             |             |
| $SMSE(\hat{y}_{MRE})$    | 17211       | 17211       | 17211       | 17211        | 17211       | 17211       | 17211       | 17211       | 17211       |
| $SMSE(\hat{y}_{SRRE})$   | 14481       | 12389       | 10748       | 9436         | 8369        | 7490        | 6756        | 6135        | 5607        |
| $SMSE(\hat{y}_{SRAURE})$ | 16953       | 16351       | 15583       | 14749        | 13907       | 13089       | 12313       | 11584       | 10906       |
| $SMSE(\hat{y}_{SRLE})$   | 6033        | 6986        | 8012        | 9109         | 10279       | 11521       | 12835       | 14221       | 15680       |
| $SMSE(\hat{y}_{SRAULE})$ | 11457       | 12566       | 13589       | 14507        | 15308       | 15980       | 16513       | 16899       | 17132       |
| $SMSE(\hat{y}_{SRPCR})$  | 10589       | 10589       | 10589       | 10589        | 10589       | 10589       | 10589       | 10589       | 10589       |
| $SMSE(\hat{y}_{SRrk})$   | 8960        | 7709        | 6725        | 5937         | <b>5295</b> | <b>4765</b> | <b>4321</b> | <b>3946</b> | <b>3625</b> |
| $SMSE(\hat{y}_{SRrd})$   | <b>3884</b> | <b>4461</b> | <b>5080</b> | <b>5741</b>  | 6444        | 7189        | 7976        | 8805        | 9676        |
| $(l, p) = (3, 2)$        |             |             |             |              |             |             |             |             |             |
| $SMSE(\hat{y}_{MRE})$    | 15859       | 15859       | 15859       | 15859        | 15859       | 15859       | 15859       | 15859       | 15859       |
| $SMSE(\hat{y}_{SRRE})$   | 13285       | 11318       | 9779        | 8552         | 7556        | 6738        | 6056        | 5482        | 4994        |
| $SMSE(\hat{y}_{SRAURE})$ | 15615       | 15048       | 14323       | 13537        | 12745       | 11976       | 11246       | 10562       | 9927        |
| $SMSE(\hat{y}_{SRLE})$   | 5388        | 6270        | 7223        | 8246         | 9340        | 10503       | 11737       | 13040       | 14414       |
| $SMSE(\hat{y}_{SRAULE})$ | 10443       | 11484       | 12445       | 13310        | 14064       | 14698       | 15200       | 15564       | 15785       |
| $SMSE(\hat{y}_{SRPCR})$  | 7664        | 7664        | 7664        | 7664         | 7664        | 7664        | 7664        | 7664        | 7664        |
| $SMSE(\hat{y}_{SRrk})$   | 6471        | 5557        | 4840        | 4267         | <b>3802</b> | <b>3418</b> | <b>3098</b> | <b>2828</b> | <b>2597</b> |
| $SMSE(\hat{y}_{SRrd})$   | <b>2783</b> | <b>3198</b> | <b>3646</b> | <b>4124</b>  | 4635        | 5177        | 5751        | 6357        | 6995        |

**Table B9. Estimated SMSE values of the predictors when n = 50 and  $\rho = 0.999$**

| k/d                      | 0.1         | 0.2         | 0.3         | 0.4         | 0.5         | 0.6         | 0.7         | 0.8         | 0.9         |
|--------------------------|-------------|-------------|-------------|-------------|-------------|-------------|-------------|-------------|-------------|
| $(l, p) = (5, 0)$        |             |             |             |             |             |             |             |             |             |
| $SMSE(\hat{Y}_{MRE})$    | 16692       | 16692       | 16692       | 16692       | 16692       | 16692       | 16692       | 16692       | 16692       |
| $SMSE(\hat{Y}_{SRRE})$   | 14034       | 11998       | 10401       | 9125        | 8088        | 7234        | 6520        | 5918        | 5405        |
| $SMSE(\hat{Y}_{SRAURE})$ | 16441       | 15855       | 15107       | 14295       | 13475       | 12679       | 11923       | 11214       | 10555       |
| $SMSE(\hat{Y}_{SRLE})$   | 5819        | 6744        | 7741        | 8807        | 9945        | 11153       | 12432       | 13781       | 15201       |
| $SMSE(\hat{Y}_{SRAULE})$ | 11091       | 12170       | 13165       | 14060       | 14840       | 15494       | 16013       | 16388       | 16616       |
| $SMSE(\hat{Y}_{SRPCR})$  | 16689       | 16689       | 16689       | 16689       | 16689       | 16689       | 16689       | 16689       | 16689       |
| $SMSE(\hat{Y}_{SRrk})$   | 14031       | 11995       | 10399       | 9123        | <b>8087</b> | <b>7232</b> | <b>6519</b> | <b>5917</b> | <b>5404</b> |
| $SMSE(\hat{Y}_{SRrd})$   | <b>5818</b> | <b>6743</b> | <b>7739</b> | <b>8805</b> | 9943        | 11151       | 12429       | 13778       | 15198       |
| $(l, p) = (4, 1)$        |             |             |             |             |             |             |             |             |             |
| $SMSE(\hat{Y}_{MRE})$    | 16427       | 16427       | 16427       | 16427       | 16427       | 16427       | 16427       | 16427       | 16427       |
| $SMSE(\hat{Y}_{SRRE})$   | 13834       | 11845       | 10284       | 9036        | 8021        | 7184        | 6484        | 5893        | 5389        |
| $SMSE(\hat{Y}_{SRAURE})$ | 16182       | 15610       | 14880       | 14088       | 13288       | 12511       | 11772       | 11080       | 10435       |
| $SMSE(\hat{Y}_{SRLE})$   | 5795        | 6704        | 7680        | 8725        | 9838        | 11019       | 12269       | 13587       | 14973       |
| $SMSE(\hat{Y}_{SRAULE})$ | 10959       | 12014       | 12985       | 13858       | 14620       | 15258       | 15764       | 16130       | 16352       |
| $SMSE(\hat{Y}_{SRPCR})$  | 10765       | 10765       | 10765       | 10765       | 10765       | 10765       | 10765       | 10765       | 10765       |
| $SMSE(\hat{Y}_{SRrk})$   | 9110        | 7839        | 6840        | 6039        | <b>5387</b> | <b>4848</b> | <b>4396</b> | <b>4015</b> | <b>3689</b> |
| $SMSE(\hat{Y}_{SRrd})$   | <b>3952</b> | <b>4538</b> | <b>5168</b> | <b>5840</b> | 6554        | 7311        | 8111        | 8953        | 9837        |
| $(l, p) = (3, 2)$        |             |             |             |             |             |             |             |             |             |
| $SMSE(\hat{Y}_{MRE})$    | 15149       | 15149       | 15149       | 15149       | 15149       | 15149       | 15149       | 15149       | 15149       |
| $SMSE(\hat{Y}_{SRRE})$   | 12696       | 10820       | 9352        | 8182        | 7233        | 6452        | 5801        | 5253        | 4787        |
| $SMSE(\hat{Y}_{SRAURE})$ | 14917       | 14376       | 13685       | 12936       | 12181       | 11447       | 10752       | 10100       | 9494        |
| $SMSE(\hat{Y}_{SRLE})$   | 5163        | 6006        | 6915        | 7891        | 8934        | 10043       | 11219       | 12463       | 13772       |
| $SMSE(\hat{Y}_{SRAULE})$ | 9986        | 10979       | 11895       | 12719       | 13439       | 14042       | 14521       | 14868       | 15079       |
| $SMSE(\hat{Y}_{SRPCR})$  | 7736        | 7736        | 7736        | 7736        | 7736        | 7736        | 7736        | 7736        | 7736        |
| $SMSE(\hat{Y}_{SRrk})$   | 6527        | 5600        | 4874        | 4294        | <b>3823</b> | <b>3435</b> | <b>3111</b> | <b>2838</b> | <b>2605</b> |
| $SMSE(\hat{Y}_{SRrd})$   | <b>2793</b> | <b>3213</b> | <b>3665</b> | <b>4150</b> | 4667        | 5216        | 5798        | 6412        | 7058        |

## Appendix C: Corollaries

### Corollary C1:

- a)  $\hat{\gamma}_{SRRE}$  is superior to  $\hat{\gamma}_{MRE}$  in MSEM sense when the regression model is misspecified due to excluding relevant variables if and only if

$$(\tau A - k\gamma)'(k(2+k)\sigma^2\tau + (1+k)^2(\tau A)(\tau A)')^{-1}(\tau A - k\gamma) \leq 1$$

$$\begin{aligned} \text{Proof: Consider } D_{(i,j)} &= D(\hat{\gamma}_{MRE}) - D(\hat{\gamma}_{SRRE}) = \sigma^2\tau - (1+k)^{-2}\sigma^2\tau \\ &= ((1+k)^2 - 1)(1+k)^{-2}\sigma^2\tau \\ &= k(2+k)(1+k)^{-2}\sigma^2\tau \end{aligned}$$

Since  $k > 0$  and  $\tau > 0$ , hence  $D_{(i,j)} > 0$ . This completes the proof.

- b) If  $A \geq 0$ ,  $\hat{\gamma}_{SRRE}$  is superior to  $\hat{\gamma}_{MRE}$  in MSEM sense when the regression model is misspecified due to excluding relevant variables if and only if  $\theta \in \mathfrak{R}(A)$  and  $\theta'A^{-1}\theta \leq 1$ , where  $A = X_*(k(2+k)(1+k)^{-2}\sigma^2\tau + (\tau A)(\tau A)' - (1+k)^{-2}(\tau A - k\gamma)(\tau A - k\gamma)' + k^2(1+k)^{-2}(\gamma + \tau A)(\gamma + \tau A)')X_*' + \delta\delta'$ ,  $\mathfrak{R}(A)$  stands for column space of  $A$  and  $A^{-1}$  is an independent choice of g-inverse of  $A$  and  $\theta = \delta + k(1+k)^{-1}X_*(\gamma + \tau A)$ .

### Corollary C2:

- a)  $\hat{\gamma}_{SRAURE}$  is superior to  $\hat{\gamma}_{MRE}$  in MSEM sense when the regression model is misspecified due to excluding relevant variables if and only if

$$((1+2k)\tau A - k^2\gamma)'(k^2(k^2+4k+2)\sigma^2\tau + (1+k)^4(\tau A)(\tau A)')^{-1}((1+2k)\tau A - k^2\gamma) \leq 1$$

$$\begin{aligned} \text{Proof: Consider } D_{(i,j)} &= D(\hat{\gamma}_{MRE}) - D(\hat{\gamma}_{SRAURE}) = \sigma^2\tau - (1+k)^{-4}(1+2k)^2\sigma^2\tau \\ &= ((1+k)^4 - (1+2k)^2)(1+k)^{-4}\sigma^2\tau \\ &= k^2(k^2+4k+2)(1+k)^{-4}\sigma^2\tau \end{aligned}$$

Since  $k > 0$  and  $\tau > 0$ , hence  $D_{(i,j)} > 0$ . This completes the proof.

- b) If  $A \geq 0$ ,  $\hat{\gamma}_{SRAURE}$  is superior to  $\hat{\gamma}_{MRE}$  in MSEM sense when the regression model is misspecified due to excluding relevant variables if and only if  $\theta \in \mathfrak{R}(A)$  and  $\theta'A^{-1}\theta \leq 1$ , where  $A = X_*\left(k^2(k^2+4k+2)(1+k)^{-4}\sigma^2\tau + (\tau A)(\tau A)' - (1+k)^{-4}((1+2k)\tau A - k^2\gamma)((1+2k)\tau A - k^2\gamma)' + k^4(1+k)^{-4}(\gamma + \tau A)(\gamma + \tau A)'\right)X_*' + \delta\delta'$ ,  $\mathfrak{R}(A)$  stands for column space of  $A$  and  $A^{-1}$  is an independent choice of g-inverse of  $A$  and  $\theta = \delta + k^2(1+k)^{-2}X_*(\gamma + \tau A)$ .

### Corollary C3:

- a)  $\hat{\gamma}_{SRLE}$  is superior to  $\hat{\gamma}_{MRE}$  in MSEM sense when the regression model is misspecified due to excluding relevant variables if and only if

$$((1+d)\tau A - (1-d)\gamma)'((3+d)(1-d)\sigma^2\tau + 2^2(\tau A)(\tau A)')^{-1}((1+d)\tau A - (1-d)\gamma) \leq 1$$

$$\begin{aligned} \text{Proof: Consider } D_{(i,j)} &= D(\hat{\gamma}_{MRE}) - D(\hat{\gamma}_{SRLE}) = \sigma^2\tau - 2^{-2}(1+d)^2\sigma^2\tau \\ &= (4 - (1+d)^2)2^{-2}\sigma^2\tau \\ &= 2^{-2}(3+d)(1-d)\sigma^2\tau \end{aligned}$$

Since  $0 < d < 1$  and  $\tau > 0$ , hence  $D_{(i,j)} > 0$ . This completes the proof.

- b) If  $A \geq 0$ ,  $\hat{y}_{SRLE}$  is superior to  $\hat{y}_{MRE}$  in MSEM sense when the regression model is misspecified due to excluding relevant variables if and only if  $\theta \in \Re(A)$  and  $\theta' A^{-1} \theta \leq 1$ , where  $A = X_* \left( 2^{-2}(3+d)(1-d)\sigma^2\tau + (\tau A)(\tau A)' - 2^{-2}((1+d)\tau A - (1-d)\gamma)((1+d)\tau A - (1-d)\gamma)' + 2^{-2}(1-d)^2(\gamma + \tau A)(\gamma + \tau A)' \right) X_*' + \delta\delta'$ ,  $\Re(A)$  stands for column space of  $A$  and  $A^{-1}$  is an independent choice of g-inverse of  $A$  and  $\theta = \delta + 2^{-1}(1-d) X_*(\gamma + \tau A)$ .

**Corollary C4:**

- a)  $\hat{y}_{SRAULE}$  is superior to  $\hat{y}_{MRE}$  in MSEM sense when the regression model is misspecified due to excluding relevant variables if and only if

$$((1+d)(3-d)\tau A - (1-d)^2\gamma)'((7+2d-d^2)(1-d)^2\sigma^2\tau + 2^4(\tau A)(\tau A)')^{-1}((1+d)(3-d)\tau A - (1-d)^2\gamma) \leq 1$$

$$\begin{aligned} \text{Proof: Consider } D_{(i,j)} &= D(\hat{y}_{MRE}) - D(\hat{y}_{SRAULE}) = \sigma^2\tau - 2^{-4}(1+d)^2(3-d)^2\sigma^2\tau \\ &= (2^{-4} - (1+d)^2(3-d)^2)2^{-4}\sigma^2\tau \\ &= 2^{-4}(7+2d-d^2)(1-d)^2\sigma^2\tau \end{aligned}$$

Since  $0 < d < 1$  and  $\tau > 0$ , hence  $D_{(i,j)} > 0$ . This completes the proof.

- b) If  $A \geq 0$ ,  $\hat{y}_{SRAULE}$  is superior to  $\hat{y}_{MRE}$  in MSEM sense when the regression model is misspecified due to excluding relevant variables if and only if  $\theta \in \Re(A)$  and  $\theta' A^{-1} \theta \leq 1$ , where  $A = X_*(2^{-4}(7+2d-d^2)(1-d)^2\sigma^2\tau + (\tau A)(\tau A)' - 2^{-4}((1+d)(3-d)\tau A - (1-d)^2\gamma)((1+d)(3-d)\tau A - (1-d)^2\gamma)' + 2^{-4}(1-d)^4(\gamma + \tau A)(\gamma + \tau A)') X_*' + \delta\delta'$ ,  $\Re(A)$  stands for column space of  $A$  and  $A^{-1}$  is an independent choice of g-inverse of  $A$  and  $\theta = \delta + 2^{-2}(1-d)^2 X_*(\gamma + \tau A)$ .

**Corollary C5:**

- a) If  $\lambda_* < 1$ ,  $\hat{y}_{SRPCR}$  is superior to  $\hat{y}_{MRE}$  in MSEM sense when the regression model is misspecified due to excluding relevant variables if and only if

$$((T_h T_h' - I)\gamma + T_h T_h' \tau A)'(\sigma^2(\tau - T_h T_h' \tau T_h' T_h) + (\tau A)(\tau A)')^{-1}((T_h T_h' - I)\gamma + T_h T_h' \tau A) \leq 1$$

where  $\lambda_*$  is the largest eigenvalue of  $T_h T_h' \tau T_h' T_h \tau^{-1}$ .

$$\begin{aligned} \text{Proof: Consider } D_{(i,j)} &= D(\hat{y}_{MRE}) - D(\hat{y}_{SRPCR}) = \sigma^2\tau - \sigma^2 T_h T_h' \tau T_h' T_h \\ &= \sigma^2(\tau - T_h T_h' \tau T_h' T_h) \end{aligned}$$

Since  $\tau > 0$ , according to Lemma A2 (see Appendix A)  $D_{(i,j)} > 0$  if  $\lambda_* < 1$ , where  $\lambda_*$  is the largest eigenvalue of  $T_h T_h' \tau T_h' T_h \tau^{-1}$ . This completes the proof.

- b) If  $A \geq 0$ ,  $\hat{y}_{SRPCR}$  is superior to  $\hat{y}_{MRE}$  in MSEM sense when the regression model is misspecified due to excluding relevant variables if and only if  $\theta \in \Re(A)$  and  $\theta' A^{-1} \theta \leq 1$ , where  $A = X_* \left( \sigma^2(\tau - T_h T_h' \tau T_h' T_h) + (\tau A)(\tau A)' - ((T_h T_h' - I)\gamma + T_h T_h' \tau A)((T_h T_h' - I)\gamma + T_h T_h' \tau A)' + (I - T_h T_h')(\gamma + \tau A)(\gamma + \tau A)'(I - T_h T_h') \right) X_*' + \delta\delta'$ ,  $\Re(A)$  stands for column space of  $A$  and  $A^{-1}$  is an independent choice of g-inverse of  $A$  and  $\theta = \delta + X_*(I - T_h T_h')(\gamma + \tau A)$ .

**Corollary C6:**

- a) If  $\lambda_* < 1$ ,  $\hat{y}_{SRrk}$  is superior to  $\hat{y}_{MRE}$  in MSEM sense when the regression model is misspecified due to excluding relevant variables if and only if

$$(1+k)^{-2}((T_h T_h' - (1+k)I)\gamma + T_h T_h' \tau A)' (\sigma^2(\tau - (1+k)^{-2} T_h T_h' \tau T_h' T_h) + (\tau A)(\tau A)')^{-1} ((T_h T_h' - (1+k)I)\gamma + T_h T_h' \tau A) \leq 1$$

where  $\lambda_*$  is the largest eigenvalue of  $(1+k)^{-2} T_h T_h' \tau T_h' T_h \tau^{-1}$ .

**Proof:** Consider  $D_{(i,j)} = D(\hat{y}_{MRE}) - D(\hat{y}_{SRrk}) = \sigma^2 \tau - (1+k)^{-2} \sigma^2 T_h T_h' \tau T_h' T_h$   
 $= \sigma^2(\tau - (1+k)^{-2} T_h T_h' \tau T_h' T_h)$

Since  $\tau > 0$ , according to Lemma A2 (see Appendix A)  $D_{(i,j)} > 0$  if  $\lambda_* < 1$ , where  $\lambda_*$  is the largest eigenvalue of  $(1+k)^{-2} T_h T_h' \tau T_h' T_h \tau^{-1}$ . This completes the proof.

- b) If  $A \geq 0$ ,  $\hat{y}_{SRrk}$  is superior to  $\hat{y}_{MRE}$  in MSEM sense when the regression model is misspecified due to excluding relevant variables if and only if  $\theta \in \Re(A)$  and  $\theta' A^{-1} \theta \leq 1$ , where  $A = X_* \left( \sigma^2(\tau - (1+k)^{-2} T_h T_h' \tau T_h' T_h) + (\tau A)(\tau A)' - (1+k)^{-2} ((T_h T_h' - (1+k)I)\gamma + T_h T_h' \tau A) ((T_h T_h' - (1+k)I)\gamma + T_h T_h' \tau A)' + (1+k)^{-2} ((1+k)I - T_h T_h') (\gamma + \tau A)(\gamma + \tau A)' ((1+k)I - T_h T_h')' \right) X_*' + \delta \delta'$ ,  $\Re(A)$  stands for column space of  $A$  and  $A^{-1}$  is an independent choice of g-inverse of  $A$  and  $\theta = \delta + (1+k)^{-1} X_* ((1+k)I - T_h T_h') (\gamma + \tau A)$ .

**Corollary C7:**

- a) If  $\lambda_* < 1$ ,  $\hat{y}_{SRrd}$  is superior to  $\hat{y}_{MRE}$  in MSEM sense when the regression model is misspecified due to excluding relevant variables if and only if

$$2^{-2}(1+d)^2((T_h T_h' - 2(1+d)^{-1}I)\gamma + T_h T_h' \tau A)' (\sigma^2(\tau - 2^{-2}(1+d)^2 T_h T_h' \tau T_h' T_h) + (\tau A)(\tau A)')^{-1} ((T_h T_h' - 2(1+d)^{-1}I)\gamma + T_h T_h' \tau A) \leq 1$$

where  $\lambda_*$  is the largest eigenvalue of  $2^{-2}(1+d)^2 T_h T_h' \tau T_h' T_h \tau^{-1}$ .

**Proof:** Consider  $D_{(i,j)} = D(\hat{y}_{MRE}) - D(\hat{y}_{SRrd}) = \sigma^2 \tau - 2^{-2}(1+d)^2 \sigma^2 T_h T_h' \tau T_h' T_h$   
 $= \sigma^2(\tau - 2^{-2}(1+d)^2 T_h T_h' \tau T_h' T_h)$

Since  $\tau > 0$ , according to Lemma A2 (see Appendix A)  $D_{(i,j)} > 0$  if  $\lambda_* < 1$ , where  $\lambda_*$  is the largest eigenvalue of  $2^{-2}(1+d)^2 T_h T_h' \tau T_h' T_h \tau^{-1}$ . This completes the proof.

- b) If  $A \geq 0$ ,  $\hat{y}_{SRrd}$  is superior to  $\hat{y}_{MRE}$  in MSEM sense when the regression model is misspecified due to excluding relevant variables if and only if  $\theta \in \Re(A)$  and  $\theta' A^{-1} \theta \leq 1$ , where  $A = X_* \left( \sigma^2(\tau - 2^{-2}(1+d)^2 T_h T_h' \tau T_h' T_h) + (\tau A)(\tau A)' - 2^{-2}(1+d)^2 ((T_h T_h' - 2(1+d)^{-1}I)\gamma + T_h T_h' \tau A) ((T_h T_h' - 2(1+d)^{-1}I)\gamma + T_h T_h' \tau A)' + 2^{-2}(1+d)^2 (2(1+d)^{-1}I - T_h T_h') (\gamma + \tau A)(\gamma + \tau A)' (2(1+d)^{-1}I - T_h T_h')' \right) X_*' + \delta \delta'$ ,  $\Re(A)$  stands for column space of  $A$  and  $A^{-1}$  is an independent choice of g-inverse of  $A$  and  $\theta = \delta + 2^{-1}(1+d) X_* (2(1+d)^{-1}I - T_h T_h') (\gamma + \tau A)$ .

**Corollary C8:**

- a)  $\hat{y}_{SRRE}$  is superior to  $\hat{y}_{SRAURE}$  in MSEM sense when the regression model is misspecified due to excluding relevant variables if and only if

$$(1+k)^2(\tau A - k\gamma)' \left( k(2+3k)\sigma^2\tau + ((1+2k)\tau A - k^2\gamma)((1+2k)\tau A - k^2\gamma)' \right)^{-1} (\tau A - k\gamma) \leq 1$$

**Proof:** Consider

$$\begin{aligned} D_{(i,j)} &= D(\hat{y}_{SRAURE}) - D(\hat{y}_{SRRE}) = (1+k)^{-4}(1+2k)^2\sigma^2\tau - (1+k)^{-2}\sigma^2\tau \\ &= ((1+2k)^2 - (1+k)^2)(1+k)^{-4}\sigma^2\tau \\ &= k(2+3k)(1+k)^{-4}\sigma^2\tau \end{aligned}$$

Since  $k > 0$  and  $\tau > 0$ , hence  $D_{(i,j)} > 0$ . This completes the proof.

- b) If  $A \geq 0$ ,  $\hat{y}_{SRRE}$  is superior to  $\hat{y}_{SRAURE}$  in MSEM sense when the regression model is misspecified due to excluding relevant variables if and only if  $\theta \in \Re(A)$  and  $\theta'A^{-1}\theta \leq 1$ , where  $A = X_* \left( k(2+3k)(1+k)^{-4}\sigma^2\tau + (1+k)^{-4}((1+2k)\tau A - k^2\gamma)((1+2k)\tau A - k^2\gamma)' - (1+k)^{-2}(\tau A - k\gamma)(\tau A - k\gamma)' + k^2(1+k)^{-4}(\gamma + \tau A)(\gamma + \tau A)' \right) X_*' + \delta\delta'$ ,  $\Re(A)$  stands for column space of  $A$  and  $A^{-1}$  is an independent choice of g-inverse of  $A$  and  $\theta = \delta + k(1+k)^{-2}X_*(\gamma + \tau A)$ .

**Corollary C9:**

- a) If  $k > (1-d)(1+d)^{-1}$ ,  $\hat{y}_{SRRE}$  is superior to  $\hat{y}_{SRLE}$  in MSEM sense when the regression model is misspecified due to excluding relevant variables if and only if

$$\begin{aligned} &2^2(1+k)^{-2}(\tau A - k\gamma)' \left( (1+k)^{-2}(k(1+d) + d + 3)(k(1+d) + d - 1)\sigma^2\tau + \right. \\ &\left. ((1+d)\tau A - (1-d)\gamma)((1+d)\tau A - (1-d)\gamma)' \right)^{-1} (\tau A - k\gamma) \leq 1 \end{aligned}$$

$$\begin{aligned} \text{Proof: Consider } D_{(i,j)} &= D(\hat{y}_{SRLE}) - D(\hat{y}_{SRRE}) = 2^{-2}(1+d)^2\sigma^2\tau - (1+k)^{-2}\sigma^2\tau \\ &= ((1+k)^2(1+d)^2 - 2^2)2^{-2}(1+k)^{-2}\sigma^2\tau \\ &= 2^{-2}(1+k)^{-2}(k(1+d) + d + 3)(k(1+d) + d - 1)\sigma^2\tau \end{aligned}$$

Since  $k > 0$ ,  $0 < d < 1$  and  $\tau > 0$ .  $D_{(i,j)} > 0$  if  $(k(1+d) + d - 1) > 0$ , which implies  $k > (1-d)(1+d)^{-1}$ . This complete the proof.

- b) If  $A \geq 0$ ,  $\hat{y}_{SRRE}$  is superior to  $\hat{y}_{SRLE}$  in MSEM sense when the regression model is misspecified due to excluding relevant variables if and only if  $\theta \in \Re(A)$  and  $\theta'A^{-1}\theta \leq 1$ , where  $A = X_* \left( 2^{-2}(1+k)^{-2}(k(1+d) + d + 3)(k(1+d) + d - 1)\sigma^2\tau + 2^{-2}((1+d)\tau A - (1-d)\gamma)((1+d)\tau A - (1-d)\gamma)' - (1+k)^{-2}(\tau A - k\gamma)(\tau A - k\gamma)' + 2^{-2}(1+k)^{-2}(1+k+d+kd)^2(\gamma + \tau A)(\gamma + \tau A)' \right) X_*' + \delta\delta'$ ,  $\Re(A)$  stands for column space of  $A$  and  $A^{-1}$  is an independent choice of g-inverse of  $A$  and  $\theta = \delta + 2^{-1}(1+k)^{-1}(1+k+d+kd)X_*(\gamma + \tau A)$ .

**Corollary C10:**

- a) If  $k > (1-d)^2(1+d)^{-1}(3-d)^{-1}$ ,  $\hat{y}_{SRRE}$  is superior to  $\hat{y}_{SRAULE}$  in MSEM sense when the regression model is misspecified due to excluding relevant variables if and only if

$$2^4(1+k)^{-2}(\tau A - k\gamma)' \left( (1+k)^{-2}(7+2d-d^2+k(1+d)(3-d))(k(1+d)(3-d) - (1-d)^2)\sigma^2\tau + ((1+d)(3-d)\tau A - (1-d)^2\gamma)((1+d)(3-d)\tau A - (1-d)^2\gamma)' \right)^{-1} (\tau A - k\gamma) \leq 1$$

**Proof:** Consider

$$\begin{aligned} D_{(i,j)} &= D(\hat{y}_{SRAULE}) - D(\hat{y}_{SRRE}) = 2^{-4}(1+d)^2(3-d)^2\sigma^2\tau - (1+k)^{-2}\sigma^2\tau \\ &= ((1+d)^2(3-d)^2(1+k)^2 - 2^4)2^{-4}(1+k)^{-2}\sigma^2\tau \\ &= 2^{-4}(1+k)^{-2}(7+2d-d^2+k(1+d)(3-d))(k(1+d)(3-d) - (1-d)^2)\sigma^2\tau \end{aligned}$$

Since  $k > 0$ ,  $0 < d < 1$  and  $\tau > 0$ .  $D_{(i,j)} > 0$  if  $(k(1+d)(3-d) - (1-d)^2) > 0$ , which implies  $k > (1-d)^2(1+d)^{-1}(3-d)^{-1}$ . This completes the proof.

- b) If  $A \geq 0$ ,  $\hat{y}_{SRRE}$  is superior to  $\hat{y}_{SRAULE}$  in MSEM sense when the regression model is misspecified due to excluding relevant variables if and only if  $\theta \in \mathfrak{R}(A)$  and  $\theta'A^{-1}\theta \leq 1$ , where  $A = X_* \left( 2^{-4}(1+k)^{-2}(7+2d-d^2+k(1+d)(3-d))(k(1+d)(3-d) - (1-d)^2)\sigma^2\tau + 2^{-4}((1+d)(3-d)\tau A - (1-d)^2\gamma)((1+d)(3-d)\tau A - (1-d)^2\gamma)' - (1+k)^{-2}(\tau A - k\gamma)(\tau A - k\gamma)' + 2^{-4}(1+k)^{-2}((1+k)d(2-d) + 3k - 1)^2(\gamma + \tau A)(\gamma + \tau A)' \right) X_*' + \delta\delta'$ ,  $\mathfrak{R}(A)$  stands for column space of  $A$  and  $A^{-1}$  is an independent choice of g-inverse of  $A$  and  $\theta = \delta + 2^{-2}(1+k)^{-1}((1+k)d(2-d) + 3k - 1)X_*(\gamma + \tau A)$ .

**Corollary C11:**

- a) If  $\lambda_* < 1$ ,  $\hat{y}_{SRPCR}$  is superior to  $\hat{y}_{SRRE}$  in MSEM sense when the regression model is misspecified due to excluding relevant variables if and only if

$$\left( (T_h T_h' - I)\gamma + T_h T_h' \tau A \right)' \left( ((1+k)^{-2}\tau - T_h T_h' \tau T_h' T_h)\sigma^2 + (1+k)^{-2}(\tau A - k\gamma)(\tau A - k\gamma)' \right)^{-1} \left( (T_h T_h' - I)\gamma + T_h T_h' \tau A \right) \leq 1$$

where  $\lambda_*$  is the largest eigenvalue of  $(1+k)^2 T_h T_h' \tau T_h' T_h \tau^{-1}$ .

$$\begin{aligned} \text{Proof: Consider } D_{(i,j)} &= D(\hat{y}_{SRRE}) - D(\hat{y}_{SRPCR}) = (1+k)^{-2}\sigma^2\tau - \sigma^2 T_h T_h' \tau T_h' T_h \\ &= ((1+k)^{-2}\tau - T_h T_h' \tau T_h' T_h)\sigma^2 \end{aligned}$$

Since  $\tau > 0$ , according to Lemma A2 (see Appendix A)  $D_{(i,j)} > 0$  if  $\lambda_* < 1$ , where  $\lambda_*$  is the largest eigenvalue of  $(1+k)^2 T_h T_h' \tau T_h' T_h \tau^{-1}$ . This completes the proof.

- b) If  $A \geq 0$ ,  $\hat{y}_{SRPCR}$  is superior to  $\hat{y}_{SRRE}$  in MSEM sense when the regression model is misspecified due to excluding relevant variables if and only if  $\theta \in \mathfrak{R}(A)$  and  $\theta'A^{-1}\theta \leq 1$ , where  $A = X_* \left( ((1+k)^{-2}\tau - T_h T_h' \tau T_h' T_h)\sigma^2 + (1+k)^{-2}(\tau A - k\gamma)(\tau A - k\gamma)' - ((T_h T_h' - I)\gamma + T_h T_h' \tau A)((T_h T_h' - I)\gamma + T_h T_h' \tau A)' + (1+k)^{-2}(I - (1+k)T_h T_h')(\gamma + \tau A)(\gamma + \tau A)'(I - (1+k)T_h T_h')' \right) X_*' + \delta\delta'$ ,  $\mathfrak{R}(A)$  stands for column space of  $A$  and  $A^{-1}$  is an independent choice of g-inverse of  $A$  and  $\theta = \delta + (1+k)^{-1}X_*(I - (1+k)T_h T_h')(\gamma + \tau A)$ .

**Corollary C12:**

- a) If  $\lambda_* < 1$ ,  $\hat{y}_{SRrk}$  is superior to  $\hat{y}_{SRRE}$  in MSEM sense when the regression model is misspecified due to excluding relevant variables if and only if

$$\left( (T_h T_h' - (1+k)I)\gamma + T_h T_h' \tau A \right)' \left( (\tau - T_h T_h' \tau T_h' T_h) \sigma^2 + (\tau A - k\gamma)(\tau A - k\gamma)' \right)^{-1} \left( (T_h T_h' - (1+k)I)\gamma + T_h T_h' \tau A \right) \leq 1$$

where  $\lambda_*$  is the largest eigenvalue of  $T_h T_h' \tau T_h' T_h \tau^{-1}$ .

**Proof:** Consider  $D_{(i,j)} = D(\hat{y}_{SRRE}) - D(\hat{y}_{SRrk}) = (1+k)^{-2} \sigma^2 \tau - (1+k)^{-2} \sigma^2 T_h T_h' \tau T_h' T_h$   
 $= (\tau - T_h T_h' \tau T_h' T_h) (1+k)^{-2} \sigma^2$

Since  $\tau > 0$ , according to Lemma A2 (see Appendix A)  $D_{(i,j)} > 0$  if  $\lambda_* < 1$ , where  $\lambda_*$  is the largest eigenvalue of  $T_h T_h' \tau T_h' T_h \tau^{-1}$ . This completes the proof.

- b) If  $A \geq 0$ ,  $\hat{y}_{SRrk}$  is superior to  $\hat{y}_{SRRE}$  in MSEM sense when the regression model is misspecified due to excluding relevant variables if and only if  $\theta \in \mathfrak{R}(A)$  and  $\theta' A^{-1} \theta \leq 1$ , where  $A = X_* \left( (\tau - T_h T_h' \tau T_h' T_h) (1+k)^{-2} \sigma^2 + (1+k)^{-2} (\tau A - k\gamma)(\tau A - k\gamma)' - (1+k)^{-2} ((T_h T_h' - (1+k)I)\gamma + T_h T_h' \tau A) ((T_h T_h' - (1+k)I)\gamma + T_h T_h' \tau A)' + (1+k)^{-2} (I - T_h T_h')(\gamma + \tau A)(\gamma + \tau A)' (I - T_h T_h')' \right) X_*' + \delta \delta'$ ,  $\mathfrak{R}(A)$  stands for column space of  $A$  and  $A^{-1}$  is an independent choice of g-inverse of  $A$  and  $\theta = \delta + (1+k)^{-1} X_* (I - T_h T_h')(\gamma + \tau A)$ .

**Corollary C13:**

- a) If  $\lambda_* < 1$ ,  $\hat{y}_{SRrd}$  is superior to  $\hat{y}_{SRRE}$  in MSEM sense when the regression model is misspecified due to excluding relevant variables if and only if

$$2^{-2} (1+d)^2 \left( (T_h T_h' - 2(1+d)^{-1} I)\gamma + T_h T_h' \tau A \right)' \left( ((1+k)^{-2} \tau - 2^{-2} (1+d)^2 T_h T_h' \tau T_h' T_h) \sigma^2 + (1+k)^{-2} (\tau A - k\gamma)(\tau A - k\gamma)' \right)^{-1} \left( (T_h T_h' - 2(1+d)^{-1} I)\gamma + T_h T_h' \tau A \right) \leq 1$$

where  $\lambda_*$  is the largest eigenvalue of  $2^{-2} (1+d)^2 (1+k)^2 T_h T_h' \tau T_h' T_h \tau^{-1}$ .

**Proof:** Consider

$$D_{(i,j)} = D(\hat{y}_{SRRE}) - D(\hat{y}_{SRrd}) = (1+k)^{-2} \sigma^2 \tau - 2^{-2} (1+d)^2 \sigma^2 T_h T_h' \tau T_h' T_h$$

$$= ((1+k)^{-2} \tau - 2^{-2} (1+d)^2 T_h T_h' \tau T_h' T_h) \sigma^2$$

Since  $\tau > 0$ , according to Lemma A2 (see Appendix A)  $D_{(i,j)} > 0$  if  $\lambda_* < 1$ , where  $\lambda_*$  is the largest eigenvalue of  $2^{-2} (1+d)^2 (1+k)^2 T_h T_h' \tau T_h' T_h \tau^{-1}$ . This completes the proof.

- b) If  $A \geq 0$ ,  $\hat{y}_{SRrd}$  is superior to  $\hat{y}_{SRRE}$  in MSEM sense when the regression model is misspecified due to excluding relevant variables if and only if  $\theta \in \mathfrak{R}(A)$  and  $\theta' A^{-1} \theta \leq 1$ , where  $A = X_* \left( ((1+k)^{-2} \tau - 2^{-2} (1+d)^2 T_h T_h' \tau T_h' T_h) \sigma^2 + (1+k)^{-2} (\tau A - k\gamma)(\tau A - k\gamma)' - 2^{-2} (1+d)^2 ((T_h T_h' - 2(1+d)^{-1} I)\gamma + T_h T_h' \tau A) ((T_h T_h' - 2(1+d)^{-1} I)\gamma + T_h T_h' \tau A)' + 2^{-2} (1+k)^{-2} (2I - (1+k)(1+d)T_h T_h')(\gamma + \tau A)(\gamma + \tau A)' (2I - (1+k)(1+d)T_h T_h')' \right) X_*' + \delta \delta'$ ,  $\mathfrak{R}(A)$  stands for column space of



$A$  and  $A^{-1}$  is an independent choice of g-inverse of  $A$  and  $\theta = \delta + 2^{-1}(1+k)^{-1}X_*(2I - (1+k)(1+d)T_h T_h')(\gamma + \tau A)$ .

**Corollary C14:**

- a) If  $d > (1+2k-k^2)(1+k)^{-2}$ ,  $\hat{\gamma}_{SRAURE}$  is superior to  $\hat{\gamma}_{SRLE}$  in MSEM sense when the regression model is misspecified due to excluding relevant variables if and only if

$$2^2((1+2k)\tau A - k^2\gamma)' \left( (3+6k+k^2+d(1+k)^2)(k^2-2k-1+d(1+k)^2)\sigma^2\tau + (1+k)^4((1+d)\tau A - (1-d)\gamma)((1+d)\tau A - (1-d)\gamma)' \right)^{-1} ((1+2k)\tau A - k^2\gamma) \leq 1$$

**Proof:** Consider

$$\begin{aligned} D_{(i,j)} &= D(\hat{\gamma}_{SRLE}) - D(\hat{\gamma}_{SRAURE}) = 2^{-2}(1+d)^2\sigma^2\tau - (1+k)^{-4}(1+2k)^2\sigma^2\tau \\ &= ((1+d)^2(1+k)^4 - 2^2(1+2k)^2)2^{-2}(1+k)^{-4}\sigma^2\tau \\ &= (3+6k+k^2+d(1+k)^2)(k^2-2k-1+d(1+k)^2)2^{-2}(1+k)^{-4}\sigma^2\tau \end{aligned}$$

Since  $k > 0$ ,  $0 < d < 1$  and  $\tau > 0$ .  $D_{(i,j)} > 0$  if  $(k^2-2k-1+d(1+k)^2) > 0$ , which implies  $d > (1+2k-k^2)(1+k)^{-2}$ . This completes the proof.

- b) If  $A \geq 0$ ,  $\hat{\gamma}_{SRAURE}$  is superior to  $\hat{\gamma}_{SRLE}$  in MSEM sense when the regression model is misspecified due to excluding relevant variables if and only if  $\theta \in \Re(A)$  and  $\theta'A^{-1}\theta \leq 1$ , where  $A = X_* \left( (3+6k+k^2+d(1+k)^2)(k^2-2k-1+d(1+k)^2)2^{-2}(1+k)^{-4}\sigma^2\tau + 2^{-2}((1+d)\tau A - (1-d)\gamma)((1+d)\tau A - (1-d)\gamma)' - (1+k)^{-4}((1+2k)\tau A - k^2\gamma)((1+2k)\tau A - k^2\gamma)' + 2^{-2}(1+k)^{-4}((1+d)k^2 + (2k+1)(d-1))^2(\gamma + \tau A)(\gamma + \tau A)' \right) X_*' + \delta\delta'$ ,  $\Re(A)$  stands for column space of  $A$  and  $A^{-1}$  is an independent choice of g-inverse of  $A$  and  $\theta = \delta + 2^{-1}(1+k)^{-2}((1+d)k^2 + (2k+1)(d-1))X_*(\gamma + \tau A)$ .

**Corollary C15:**

- a) If  $(1+d)(3-d) > 4(1+2k)(1+k)^{-2}$ ,  $\hat{\gamma}_{SRAURE}$  is superior to  $\hat{\gamma}_{SRAULE}$  in MSEM sense when the regression model is misspecified due to excluding relevant variables if and only if

$$2^4((1+2k)\tau A - k^2\gamma)' \left( ((1+k)^2(1+d)(3-d) + 4(1+2k))((1+k)^2(1+d)(3-d) - 4(1+2k))\sigma^2\tau + (1+k)^4((1+d)(3-d)\tau A - (1-d)^2\gamma)((1+d)(3-d)\tau A - (1-d)^2\gamma)' \right)^{-1} ((1+2k)\tau A - k^2\gamma) \leq 1$$

**Proof:** Consider

$$\begin{aligned} D_{(i,j)} &= D(\hat{\gamma}_{SRAULE}) - D(\hat{\gamma}_{SRAURE}) = 2^{-4}(1+d)^2(3-d)^2\sigma^2\tau - (1+k)^{-4}(1+2k)^2\sigma^2\tau \\ &= ((1+k)^4(1+d)^2(3-d)^2 - 2^4(1+2k)^2)2^{-4}(1+k)^{-4}\sigma^2\tau \\ &= ((1+k)^2(1+d)(3-d) + 4(1+2k))((1+k)^2(1+d)(3-d) - 4(1+2k))2^{-4}(1+k)^{-4}\sigma^2\tau \end{aligned}$$

Since  $k > 0$ ,  $0 < d < 1$  and  $\tau > 0$ .  $D_{(i,j)} > 0$  if  $((1+k)^2(1+d)(3-d) - 4(1+2k)) > 0$ , which implies  $(1+d)(3-d) > 4(1+2k)(1+k)^{-2}$ . This completes the proof.

- b) If  $A \geq 0$ ,  $\hat{y}_{SRAURE}$  is superior to  $\hat{y}_{SRAULE}$  in MSEM sense when the regression model is misspecified due to excluding relevant variables if and only if  $\theta \in \Re(A)$  and  $\theta'A^{-1}\theta \leq 1$ , where  $A = X_* \left( ((1+k)^2(1+d)(3-d) + 4(1+2k))((1+k)^2(1+d)(3-d) - 4(1+2k))2^{-4}(1+k)^{-4}\sigma^2\tau + 2^{-4}((1+d)(3-d)\tau A - (1-d)^2\gamma)((1+d)(3-d)\tau A - (1-d)^2\gamma)' - (1+k)^{-4}((1+2k)\tau A - k^2\gamma)((1+2k)\tau A - k^2\gamma)' + 2^{-4}(1+k)^{-4}((k-1)(3k+1) + d(2-d)(1+k)^2)^2(\gamma + \tau A)(\gamma + \tau A)' \right) X_*' + \delta\delta'$ ,  $\Re(A)$  stands for column space of  $A$  and  $A^{-1}$  is an independent choice of g-inverse of  $A$  and  $\theta = \delta + 2^{-2}(1+k)^{-2}((k-1)(3k+1) + d(2-d)(1+k)^2)X_*(\gamma + \tau A)$ .

**Corollary C16:**

- a) If  $\lambda_* < 1$ ,  $\hat{y}_{SRPCR}$  is superior to  $\hat{y}_{SRAURE}$  in MSEM sense when the regression model is misspecified due to excluding relevant variables if and only if
- $$\left( (T_h T_h' - I)\gamma + T_h T_h' \tau A \right)' \left( ((1+k)^{-4}(1+2k)^2\tau - T_h T_h' \tau T_h' T_h) \sigma^2 + (1+k)^{-4}((1+2k)\tau A - k^2\gamma)((1+2k)\tau A - k^2\gamma)' \right)^{-1} \left( (T_h T_h' - I)\gamma + T_h T_h' \tau A \right) \leq 1$$
- where  $\lambda_*$  is the largest eigenvalue of  $(1+k)^4(1+2k)^{-2}T_h T_h' \tau T_h' T_h \tau^{-1}$ .

**Proof:** Consider

$$\begin{aligned} D_{(i,j)} &= D(\hat{y}_{SRAURE}) - D(\hat{y}_{SRPCR}) = (1+k)^{-4}(1+2k)^2\sigma^2\tau - \sigma^2 T_h T_h' \tau T_h' T_h \\ &= ((1+k)^{-4}(1+2k)^2\tau - T_h T_h' \tau T_h' T_h) \sigma^2 \end{aligned}$$

Since  $\tau > 0$ , according to Lemma A2 (see Appendix A)  $D_{(i,j)} > 0$  if  $\lambda_* < 1$ , where  $\lambda_*$  is the largest eigenvalue of  $(1+k)^4(1+2k)^{-2}T_h T_h' \tau T_h' T_h \tau^{-1}$ . This completes the proof.

- b) If  $A \geq 0$ ,  $\hat{y}_{SRPCR}$  is superior to  $\hat{y}_{SRAURE}$  in MSEM sense when the regression model is misspecified due to excluding relevant variables if and only if  $\theta \in \Re(A)$  and  $\theta'A^{-1}\theta \leq 1$ , where  $A = X_* \left( ((1+k)^{-4}(1+2k)^2\tau - T_h T_h' \tau T_h' T_h) \sigma^2 + (1+k)^{-4}((1+2k)\tau A - k^2\gamma)((1+2k)\tau A - k^2\gamma)' - ((T_h T_h' - I)\gamma + T_h T_h' \tau A)((T_h T_h' - I)\gamma + T_h T_h' \tau A)' + (1+k)^{-4}((1+2k)I - (1+k)^2 T_h T_h')(\gamma + \tau A)(\gamma + \tau A)'((1+2k)I - (1+k)^2 T_h T_h')' \right) X_*' + \delta\delta'$ ,  $\Re(A)$  stands for column space of  $A$  and  $A^{-1}$  is an independent choice of g-inverse of  $A$  and  $\theta = \delta + (1+k)^{-2}X_*((1+2k)I - (1+k)^2 T_h T_h')(\gamma + \tau A)$ .

**Corollary C17:**

- a) If  $\lambda_* < 1$ ,  $\hat{y}_{SRrk}$  is superior to  $\hat{y}_{SRAURE}$  in MSEM sense when the regression model is misspecified due to excluding relevant variables if and only if

$$(1+k)^2((T_h T_h' - (1+k)I)\gamma + T_h T_h' \tau A)' \left( ((1+2k)^2 \tau - (1+k)^2 T_h T_h' \tau T_h' T_h) \sigma^2 + \right. \\ \left. ((1+2k)\tau A - k^2 \gamma) ((1+2k)\tau A - k^2 \gamma)' \right)^{-1} ((T_h T_h' - (1+k)I)\gamma + T_h T_h' \tau A) \leq 1$$

where  $\lambda_*$  is the largest eigenvalue of  $(1+2k)^{-2}(1+k)^2 T_h T_h' \tau T_h' T_h \tau^{-1}$ .

**Proof:** Consider

$$D_{(i,j)} = D(\hat{y}_{SRAURE}) - D(\hat{y}_{SRRk}) = (1+k)^{-4}(1+2k)^2 \sigma^2 \tau - (1+k)^{-2} \sigma^2 T_h T_h' \tau T_h' T_h \\ = ((1+2k)^2 \tau - (1+k)^2 T_h T_h' \tau T_h' T_h) (1+k)^{-4} \sigma^2$$

Since  $\tau > 0$ , according to Lemma A2 (see Appendix A)  $D_{(i,j)} > 0$  if  $\lambda_* < 1$ , where  $\lambda_*$  is the largest eigenvalue of  $(1+2k)^{-2}(1+k)^2 T_h T_h' \tau T_h' T_h \tau^{-1}$ . This completes the proof.

- b) If  $A \geq 0$ ,  $\hat{y}_{SRRk}$  is superior to  $\hat{y}_{SRAURE}$  in MSEM sense when the regression model is misspecified due to excluding relevant variables if and only if  $\theta \in \mathfrak{R}(A)$  and  $\theta' A^{-1} \theta \leq 1$ , where  $A = X_* \left( ((1+2k)^2 \tau - (1+k)^2 T_h T_h' \tau T_h' T_h) (1+k)^{-4} \sigma^2 + (1+k)^{-4} ((1+2k)\tau A - k^2 \gamma) ((1+2k)\tau A - k^2 \gamma)' - (1+k)^{-2} ((T_h T_h' - (1+k)I)\gamma + T_h T_h' \tau A) ((T_h T_h' - (1+k)I)\gamma + T_h T_h' \tau A)' + (1+k)^{-4} ((1+2k)I - (1+k)T_h T_h') (\gamma + \tau A) (\gamma + \tau A)' ((1+2k)I - (1+k)T_h T_h')' \right) X_*' + \delta \delta'$ ,  $\mathfrak{R}(A)$  stands for column space of  $A$  and  $A^{-1}$  is an independent choice of g-inverse of  $A$  and  $\theta = \delta + (1+k)^{-2} X_* ((1+2k)I - (1+k)T_h T_h') (\gamma + \tau A)$ .

**Corollary C18:**

- a) If  $\lambda_* < 1$ ,  $\hat{y}_{SRRd}$  is superior to  $\hat{y}_{SRAURE}$  in MSEM sense when the regression model is misspecified due to excluding relevant variables if and only if

$$2^{-2}(1+d)^2((T_h T_h' - 2(1+d)^{-1}I)\gamma + T_h T_h' \tau A)' \left( ((1+k)^{-4}(1+2k)^2 \tau - 2^{-2}(1+d)^2 T_h T_h' \tau T_h' T_h) \sigma^2 + (1+k)^{-4} ((1+2k)\tau A - k^2 \gamma) ((1+2k)\tau A - k^2 \gamma)' \right)^{-1} ((T_h T_h' - 2(1+d)^{-1}I)\gamma + T_h T_h' \tau A) \leq 1$$

where  $\lambda_*$  is the largest eigenvalue of  $2^{-2}(1+d)^2(1+k)^4(1+2k)^{-2} T_h T_h' \tau T_h' T_h \tau^{-1}$ .

**Proof:** Consider

$$D_{(i,j)} = D(\hat{y}_{SRAURE}) - D(\hat{y}_{SRRd}) = (1+k)^{-4}(1+2k)^2 \sigma^2 \tau - 2^{-2}(1+d)^2 \sigma^2 T_h T_h' \tau T_h' T_h \\ = ((1+k)^{-4}(1+2k)^2 \tau - 2^{-2}(1+d)^2 T_h T_h' \tau T_h' T_h) \sigma^2$$

Since  $\tau > 0$ , according to Lemma A2 (see Appendix A)  $D_{(i,j)} > 0$  if  $\lambda_* < 1$ , where  $\lambda_*$  is the largest eigenvalue of  $2^{-2}(1+d)^2(1+k)^4(1+2k)^{-2} T_h T_h' \tau T_h' T_h \tau^{-1}$ . This completes the proof.

- b) If  $A \geq 0$ ,  $\hat{y}_{SRRd}$  is superior to  $\hat{y}_{SRAURE}$  in MSEM sense when the regression model is misspecified due to excluding relevant variables if and only if  $\theta \in \mathfrak{R}(A)$  and  $\theta' A^{-1} \theta \leq 1$ , where  $A = X_* \left( ((1+k)^{-4}(1+2k)^2 \tau - 2^{-2}(1+d)^2 T_h T_h' \tau T_h' T_h) \sigma^2 + (1+k)^{-4} ((1+2k)\tau A - k^2 \gamma) ((1+2k)\tau A - k^2 \gamma)' - 2^{-2}(1+d)^2 ((T_h T_h' - 2(1+d)^{-1}I)\gamma + T_h T_h' \tau A) ((T_h T_h' - 2(1+d)^{-1}I)\gamma + T_h T_h' \tau A)' + 2^{-2}(1+k)^{-4} (2(1+2k)I - (1+k)^2(1+d)T_h T_h') (\gamma + \tau A) (\gamma + \tau A)' (2(1+2k)I - (1+k)^2(1+d)T_h T_h')' \right) X_*' + \delta \delta'$ .

$d)T_h T_h')' X_*' + \delta \delta'$ ,  $\Re(A)$  stands for column space of  $A$  and  $A^{-1}$  is an independent choice of g-inverse of  $A$  and  $\theta = \delta + 2^{-1}(1+k)^{-2}X_*(2(1+2k)I - (1+k)^2(1+d)T_h T_h')(\gamma + \tau A)$ .

**Corollary C19:**

- a)  $\hat{Y}_{SRLE}$  is superior to  $\hat{Y}_{SRAULE}$  in MSEM sense when the regression model is misspecified due to excluding relevant variables if and only if

$$2^2((1+d)\tau A - (1-d)\gamma)' \left( (5-d)(1-d)(1+d)^2\sigma^2\tau + ((1+d)(3-d)\tau A - (1-d)^2\gamma)((1+d)(3-d)\tau A - (1-d)^2\gamma)' \right)^{-1} ((1+d)\tau A - (1-d)\gamma) \leq 1$$

$$\begin{aligned} \textbf{Proof:} \text{ Consider } D_{(i,j)} &= D(\hat{Y}_{SRAULE}) - D(\hat{Y}_{SRLE}) = 2^{-4}(1+d)^2(3-d)^2\sigma^2\tau - 2^{-2}(1+d)^2\sigma^2\tau \\ &= ((3-d)^2 - 2^2)2^{-4}(1+d)^2\sigma^2\tau \\ &= (5-d)(1-d)2^{-4}(1+d)^2\sigma^2\tau \end{aligned}$$

Since  $0 < d < 1$  and  $\tau > 0$ , hence  $D_{(i,j)} > 0$ . This completes the proof.

- b) If  $A \geq 0$ ,  $\hat{Y}_{SRLE}$  is superior to  $\hat{Y}_{SRAULE}$  in MSEM sense when the regression model is misspecified due to excluding relevant variables if and only if  $\theta \in \Re(A)$  and  $\theta'A^{-1}\theta \leq 1$ , where  $A = X_* \left( (5-d)(1-d)2^{-4}(1+d)^2\sigma^2\tau + 2^{-4}((1+d)(3-d)\tau A - (1-d)^2\gamma)((1+d)(3-d)\tau A - (1-d)^2\gamma)' - 2^{-2}((1+d)\tau A - (1-d)\gamma)((1+d)\tau A - (1-d)\gamma)' + 2^{-4}(1+d)^2(1-d)^2(\gamma + \tau A)(\gamma + \tau A)' \right) X_*' + \delta \delta'$ ,  $\Re(A)$  stands for column space of  $A$  and  $A^{-1}$  is an independent choice of g-inverse of  $A$  and  $\theta = \delta + 2^{-2}(1+d)(1-d)X_*(\gamma + \tau A)$ .

**Corollary C20:**

- a) If  $\lambda_* < 1$ ,  $\hat{Y}_{SRPCR}$  is superior to  $\hat{Y}_{SRLE}$  in MSEM sense when the regression model is misspecified due to excluding relevant variables if and only if

$$((T_h T_h' - I)\gamma + T_h T_h' \tau A)' \left( (2^{-2}(1+d)^2\tau - T_h T_h' \tau T_h' T_h)\sigma^2 + 2^{-2}((1+d)\tau A - (1-d)\gamma)((1+d)\tau A - (1-d)\gamma)' \right)^{-1} ((T_h T_h' - I)\gamma + T_h T_h' \tau A) \leq 1$$

where  $\lambda_*$  is the largest eigenvalue of  $2^2(1+d)^{-2}T_h T_h' \tau T_h' T_h \tau^{-1}$ .

$$\begin{aligned} \textbf{Proof:} \text{ Consider } D_{(i,j)} &= D(\hat{Y}_{SRLE}) - D(\hat{Y}_{SRPCR}) = 2^{-2}(1+d)^2\sigma^2\tau - \sigma^2 T_h T_h' \tau T_h' T_h \\ &= (2^{-2}(1+d)^2\tau - T_h T_h' \tau T_h' T_h)\sigma^2 \end{aligned}$$

Since  $\tau > 0$ , according to Lemma A2 (see Appendix A)  $D_{(i,j)} > 0$  if  $\lambda_* < 1$ , where  $\lambda_*$  is the largest eigenvalue of  $2^2(1+d)^{-2}T_h T_h' \tau T_h' T_h \tau^{-1}$ . This completes the proof.

- b) If  $A \geq 0$ ,  $\hat{Y}_{SRPCR}$  is superior to  $\hat{Y}_{SRLE}$  in MSEM sense when the regression model is misspecified due to excluding relevant variables if and only if  $\theta \in \Re(A)$  and  $\theta'A^{-1}\theta \leq 1$ , where  $A = X_* \left( (2^{-2}(1+d)^2\tau - T_h T_h' \tau T_h' T_h)\sigma^2 + 2^{-2}((1+d)\tau A - (1-d)\gamma)((1+d)\tau A - (1-d)\gamma)' - ((T_h T_h' - I)\gamma + T_h T_h' \tau A)((T_h T_h' - I)\gamma + T_h T_h' \tau A)' + 2^{-2}((1+d)I - 2T_h T_h')(\gamma + \tau A)(\gamma + \tau A)'((1+d)I - \right.$

$2T_h T_h')' X_*' + \delta \delta'$ ,  $\Re(A)$  stands for column space of  $A$  and  $A^{-1}$  is an independent choice of g-inverse of  $A$  and  $\theta = \delta + 2^{-1} X_*' ((1+d)I - 2T_h T_h') (\gamma + \tau A)$ .

**Corollary C21:**

- a) If  $\lambda_* < 1$ ,  $\hat{y}_{SRrk}$  is superior to  $\hat{y}_{SRLE}$  in MSEM sense when the regression model is misspecified due to excluding relevant variables if and only if

$$(1+k)^{-2} ((T_h T_h' - (1+k)I) \gamma + T_h T_h' \tau A)' \left( (2^{-2}(1+d)^2 \tau - (1+k)^{-2} T_h T_h' \tau T_h' T_h) \sigma^2 + 2^{-2} ((1+d)\tau A - (1-d)\gamma) ((1+d)\tau A - (1-d)\gamma)' \right)^{-1} ((T_h T_h' - (1+k)I) \gamma + T_h T_h' \tau A) \leq 1$$

where  $\lambda_*$  is the largest eigenvalue of  $2^2(1+d)^{-2}(1+k)^{-2} T_h T_h' \tau T_h' T_h \tau^{-1}$ .

**Proof:** Consider  $D_{(i,j)} = D(\hat{y}_{SRLE}) - D(\hat{y}_{SRrk}) = 2^{-2}(1+d)^2 \sigma^2 \tau - (1+k)^{-2} \sigma^2 T_h T_h' \tau T_h' T_h$   
 $= (2^{-2}(1+d)^2 \tau - (1+k)^{-2} T_h T_h' \tau T_h' T_h) \sigma^2$

Since  $\tau > 0$ , according to Lemma A2 (see Appendix A)  $D_{(i,j)} > 0$  if  $\lambda_* < 1$ , where  $\lambda_*$  is the largest eigenvalue of  $2^2(1+d)^{-2}(1+k)^{-2} T_h T_h' \tau T_h' T_h \tau^{-1}$ . This completes the proof.

- b) If  $A \geq 0$ ,  $\hat{y}_{SRrk}$  is superior to  $\hat{y}_{SRLE}$  in MSEM sense when the regression model is misspecified due to excluding relevant variables if and only if  $\theta \in \Re(A)$  and  $\theta' A^{-1} \theta \leq 1$ , where  $A = X_*' \left( (2^{-2}(1+d)^2 \tau - (1+k)^{-2} T_h T_h' \tau T_h' T_h) \sigma^2 + 2^{-2} ((1+d)\tau A - (1-d)\gamma) ((1+d)\tau A - (1-d)\gamma)' - (1+k)^{-2} ((T_h T_h' - (1+k)I) \gamma + T_h T_h' \tau A) ((T_h T_h' - (1+k)I) \gamma + T_h T_h' \tau A)' + 2^{-2}(1+k)^{-2} ((1+k)(1+d)I - 2T_h T_h') (\gamma + \tau A) (\gamma + \tau A)' ((1+k)(1+d)I - 2T_h T_h')' \right) X_*' + \delta \delta'$ ,  $\Re(A)$  stands for column space of  $A$  and  $A^{-1}$  is an independent choice of g-inverse of  $A$  and  $\theta = \delta + 2^{-1}(1+k)^{-1} X_*' ((1+k)(1+d)I - 2T_h T_h') (\gamma + \tau A)$ .

**Corollary C22:**

- a) If  $\lambda_* < 1$ ,  $\hat{y}_{SRrd}$  is superior to  $\hat{y}_{SRLE}$  in MSEM sense when the regression model is misspecified due to excluding relevant variables if and only if

$$((T_h T_h' - 2(1+d)^{-1}I) \gamma + T_h T_h' \tau A)' \left( (\tau - T_h T_h' \tau T_h' T_h) \sigma^2 + (1+d)^{-2} ((1+d)\tau A - (1-d)\gamma) ((1+d)\tau A - (1-d)\gamma)' \right)^{-1} ((T_h T_h' - 2(1+d)^{-1}I) \gamma + T_h T_h' \tau A) \leq 1$$

where  $\lambda_*$  is the largest eigenvalue of  $T_h T_h' \tau T_h' T_h \tau^{-1}$ .

**Proof:** Consider  $D_{(i,j)} = D(\hat{y}_{SRLE}) - D(\hat{y}_{SRrd}) = 2^{-2}(1+d)^2 \sigma^2 \tau - 2^{-2}(1+d)^2 \sigma^2 T_h T_h' \tau T_h' T_h$   
 $= (\tau - T_h T_h' \tau T_h' T_h) 2^{-2}(1+d)^2 \sigma^2$

Since  $\tau > 0$ , according to Lemma A2 (see Appendix A)  $D_{(i,j)} > 0$  if  $\lambda_* < 1$ , where  $\lambda_*$  is the largest eigenvalue of  $T_h T_h' \tau T_h' T_h \tau^{-1}$ . This completes the proof.

- b) If  $A \geq 0$ ,  $\hat{y}_{SRrd}$  is superior to  $\hat{y}_{SRLE}$  in MSEM sense when the regression model is misspecified due to excluding relevant variables if and only if  $\theta \in \Re(A)$  and  $\theta' A^{-1} \theta \leq 1$ , where  $A = X_*' ((\tau -$

$T_h T_h' \tau T_h' T_h) 2^{-2} (1+d)^2 \sigma^2 + 2^{-2} ((1+d)\tau A - (1-d)\gamma)((1+d)\tau A - (1-d)\gamma)' - 2^{-2} (1+d)^2 ((T_h T_h' - 2(1+d)^{-1}I)\gamma + T_h T_h' \tau A)((T_h T_h' - 2(1+d)^{-1}I)\gamma + T_h T_h' \tau A)' + 2^{-2} (1+d)^2 (I - T_h T_h')(\gamma + \tau A)(\gamma + \tau A)'(I - T_h T_h')' \Big) X_*' + \delta \delta', \mathfrak{R}(A)$  stands for column space of  $A$  and  $A^{-1}$  is an independent choice of g-inverse of  $A$  and  $\theta = \delta + 2^{-1}(1+d)X_*(I - T_h T_h')(\gamma + \tau A)$ .

**Corollary C23:**

- a) If  $\lambda_* < 1$ ,  $\hat{Y}_{SRPCR}$  is superior to  $\hat{Y}_{SRAULE}$  in MSEM sense when the regression model is misspecified due to excluding relevant variables if and only if

$$\left( (T_h T_h' - I)\gamma + T_h T_h' \tau A \right)' \left( (2^{-4}(1+d)^2(3-d)^2\tau - T_h T_h' \tau T_h' T_h)\sigma^2 + 2^{-4}((1+d)(3-d)\tau A - (1-d)^2\gamma)((1+d)(3-d)\tau A - (1-d)^2\gamma)' \right)^{-1} \left( (T_h T_h' - I)\gamma + T_h T_h' \tau A \right) \leq 1$$

where  $\lambda_*$  is the largest eigenvalue of  $2^4(1+d)^{-2}(3-d)^{-2}T_h T_h' \tau T_h' T_h \tau^{-1}$ .

**Proof:** Consider

$$\begin{aligned} D_{(i,j)} &= D(\hat{Y}_{SRAULE}) - D(\hat{Y}_{SRPCR}) = 2^{-4}(1+d)^2(3-d)^2\sigma^2\tau - \sigma^2 T_h T_h' \tau T_h' T_h \\ &= (2^{-4}(1+d)^2(3-d)^2\tau - T_h T_h' \tau T_h' T_h)\sigma^2 \end{aligned}$$

Since  $\tau > 0$ , according to Lemma A2 (see Appendix A)  $D_{(i,j)} > 0$  if  $\lambda_* < 1$ , where  $\lambda_*$  is the largest eigenvalue of  $2^4(1+d)^{-2}(3-d)^{-2}T_h T_h' \tau T_h' T_h \tau^{-1}$ . This completes the proof.

- b) If  $A \geq 0$ ,  $\hat{Y}_{SRPCR}$  is superior to  $\hat{Y}_{SRAULE}$  in MSEM sense when the regression model is misspecified due to excluding relevant variables if and only if  $\theta \in \mathfrak{R}(A)$  and  $\theta' A^{-1} \theta \leq 1$ , where  $A = X_* \left( (2^{-4}(1+d)^2(3-d)^2\tau - T_h T_h' \tau T_h' T_h)\sigma^2 + 2^{-4}((1+d)(3-d)\tau A - (1-d)^2\gamma)((1+d)(3-d)\tau A - (1-d)^2\gamma)' - ((T_h T_h' - I)\gamma + T_h T_h' \tau A)((T_h T_h' - I)\gamma + T_h T_h' \tau A)' + 2^{-4}((1+d)(3-d)I - 2^2 T_h T_h')(\gamma + \tau A)(\gamma + \tau A)'((1+d)(3-d)I - 2^2 T_h T_h')' \right) X_*' + \delta \delta'$ ,  $\mathfrak{R}(A)$  stands for column space of  $A$  and  $A^{-1}$  is an independent choice of g-inverse of  $A$  and  $\theta = \delta + 2^{-2}X_*((1+d)(3-d)I - 2^2 T_h T_h')(\gamma + \tau A)$ .

**Corollary C24:**

- a) If  $\lambda_* < 1$ ,  $\hat{Y}_{SRrk}$  is superior to  $\hat{Y}_{SRAULE}$  in MSEM sense when the regression model is misspecified due to excluding relevant variables if and only if

$$\begin{aligned} (1+k)^{-2} \left( (T_h T_h' - (1+k)I)\gamma + T_h T_h' \tau A \right)' & \left( (2^{-4}(1+d)^2(3-d)^2\tau - (1+k)^{-2}T_h T_h' \tau T_h' T_h)\sigma^2 + \right. \\ & \left. 2^{-4}((1+d)(3-d)\tau A - (1-d)^2\gamma)((1+d)(3-d)\tau A - (1-d)^2\gamma)' \right)^{-1} \left( (T_h T_h' - (1+k)I)\gamma + \right. \\ & \left. T_h T_h' \tau A \right) \leq 1 \end{aligned}$$

where  $\lambda_*$  is the largest eigenvalue of  $2^4(1+d)^{-2}(3-d)^{-2}(1+k)^{-2}T_h T_h' \tau T_h' T_h \tau^{-1}$ .

**Proof:** Consider  $D_{(i,j)} = D(\hat{Y}_{SRAULE}) - D(\hat{Y}_{SRrk}) = 2^{-4}(1+d)^2(3-d)^2\sigma^2\tau - (1+k)^{-2}\sigma^2 T_h T_h' \tau T_h' T_h$   
 $= (2^{-4}(1+d)^2(3-d)^2\tau - (1+k)^{-2}T_h T_h' \tau T_h' T_h)\sigma^2$

Since  $\tau > 0$ , according to Lemma A2 (see Appendix A)  $D_{(i,j)} > 0$  if  $\lambda_* < 1$ , where  $\lambda_*$  is the largest eigenvalue of  $2^4(1+d)^{-2}(3-d)^{-2}(1+k)^{-2}T_h T_h' \tau T_h' T_h \tau^{-1}$ . This completes the proof.

- b) If  $A \geq 0$ ,  $\hat{y}_{SRrk}$  is superior to  $\hat{y}_{SRAULE}$  in MSEM sense when the regression model is misspecified due to excluding relevant variables if and only if  $\theta \in \Re(A)$  and  $\theta'A^{-1}\theta \leq 1$ , where  $A = X_* \left( (2^{-4}(1+d)^2(3-d)^2\tau - (1+k)^{-2}T_hT_h'\tau T_h'T_h)\sigma^2 + 2^{-4}((1+d)(3-d)\tau A - (1-d)^2\gamma)((1+d)(3-d)\tau A - (1-d)^2\gamma)' - (1+k)^{-2}((T_hT_h' - (1+k)I)\gamma + T_hT_h'\tau A)((T_hT_h' - (1+k)I)\gamma + T_hT_h'\tau A)' + 2^{-4}(1+k)^{-2}((1+k)(1+d)(3-d)I - 2^2T_hT_h')(\gamma + \tau A)(\gamma + \tau A)'((1+k)(1+d)(3-d)I - 2^2T_hT_h')' \right) X_*' + \delta\delta'$ ,  $\Re(A)$  stands for column space of  $A$  and  $A^{-1}$  is an independent choice of g-inverse of  $A$  and  $\theta = \delta + 2^{-2}(1+k)^{-1}X_*((1+k)(1+d)(3-d)I - 2^2T_hT_h')(\gamma + \tau A)$ .

**Corollary C25:**

- a) If  $\lambda_* < 1$ ,  $\hat{y}_{SRrd}$  is superior to  $\hat{y}_{SRAULE}$  in MSEM sense when the regression model is misspecified due to excluding relevant variables if and only if

$$2^2(1+d)^2((T_hT_h' - 2(1+d)^{-1}I)\gamma + T_hT_h'\tau A)'(((3-d)^2\tau - 2^2T_hT_h'\tau T_h'T_h)(1+d)^2\sigma^2 + ((1+d)(3-d)\tau A - (1-d)^2\gamma)((1+d)(3-d)\tau A - (1-d)^2\gamma)')^{-1}((T_hT_h' - 2(1+d)^{-1}I)\gamma + T_hT_h'\tau A) \leq 1$$

where  $\lambda_*$  is the largest eigenvalue of  $2^2(3-d)^{-2}T_hT_h'\tau T_h'T_h\tau^{-1}$ .

**Proof:** Consider

$$D_{(i,j)} = D(\hat{y}_{SRAULE}) - D(\hat{y}_{SRrd}) = 2^{-4}(1+d)^2(3-d)^2\sigma^2\tau - 2^{-2}(1+d)^2\sigma^2T_hT_h'\tau T_h'T_h \\ = ((3-d)^2\tau - 2^2T_hT_h'\tau T_h'T_h)2^{-4}(1+d)^2\sigma^2$$

Since  $\tau > 0$ , according to Lemma A2 (see Appendix A)  $D_{(i,j)} > 0$  if  $\lambda_* < 1$ , where  $\lambda_*$  is the largest eigenvalue of  $2^2(3-d)^{-2}T_hT_h'\tau T_h'T_h\tau^{-1}$ . This completes the proof.

- b) If  $A \geq 0$ ,  $\hat{y}_{SRrd}$  is superior to  $\hat{y}_{SRAULE}$  in MSEM sense when the regression model is misspecified due to excluding relevant variables if and only if  $\theta \in \Re(A)$  and  $\theta'A^{-1}\theta \leq 1$ , where  $A = X_* \left( ((3-d)^2\tau - 2^2T_hT_h'\tau T_h'T_h)2^{-4}(1+d)^2\sigma^2 + 2^{-4}((1+d)(3-d)\tau A - (1-d)^2\gamma)((1+d)(3-d)\tau A - (1-d)^2\gamma)' - 2^{-2}(1+d)^2((T_hT_h' - 2(1+d)^{-1}I)\gamma + T_hT_h'\tau A)((T_hT_h' - 2(1+d)^{-1}I)\gamma + T_hT_h'\tau A)' + 2^{-4}(1+d)^2((3-d)I - 2T_hT_h')(\gamma + \tau A)(\gamma + \tau A)'((3-d)I - 2T_hT_h')' \right) X_*' + \delta\delta'$ ,  $\Re(A)$  stands for column space of  $A$  and  $A^{-1}$  is an independent choice of g-inverse of  $A$  and  $\theta = \delta + 2^{-2}(1+d)X_*((3-d)I - 2T_hT_h')(\gamma + \tau A)$ .

**Corollary C26:**

- a) If  $T_hT_h'\tau T_h'T_h$  is positive definite,  $\hat{y}_{SRrk}$  is superior to  $\hat{y}_{SRPCR}$  in MSEM sense when the regression model is misspecified due to excluding relevant variables if and only if

$$(1+k)^{-2}((T_hT_h' - (1+k)I)\gamma + T_hT_h'\tau A)' \left( k(2+k)(1+k)^{-2}\sigma^2T_hT_h'\tau T_h'T_h + ((T_hT_h' - I)\gamma + T_hT_h'\tau A)((T_hT_h' - I)\gamma + T_hT_h'\tau A)' \right)^{-1} ((T_hT_h' - (1+k)I)\gamma + T_hT_h'\tau A) \leq 1$$

$$\textbf{Proof:} \text{ Consider } D_{(i,j)} = D(\hat{y}_{SRPCR}) - D(\hat{y}_{SRrk}) = \sigma^2T_hT_h'\tau T_h'T_h - (1+k)^{-2}\sigma^2T_hT_h'\tau T_h'T_h \\ = \sigma^2T_hT_h'(\tau - (1+k)^{-2}\tau)T_h'T_h$$

$$\begin{aligned}
&= \sigma^2 T_h T_h' k(2+k)(1+k)^{-2} \tau T_h' T_h \\
&= k(2+k)(1+k)^{-2} \sigma^2 T_h T_h' \tau T_h' T_h
\end{aligned}$$

Since  $k > 0$  and  $\tau > 0$ .  $D_{(i,j)} > 0$  if  $T_h T_h' \tau T_h' T_h$  is positive definite. This completes the proof.

- b) If  $A \geq 0$ ,  $\hat{y}_{SRrk}$  is superior to  $\hat{y}_{SRPCR}$  in MSEM sense when the regression model is misspecified due to excluding relevant variables if and only if  $\theta \in \Re(A)$  and  $\theta' A^{-1} \theta \leq 1$ , where  $A = X_* \left( k(2+k)(1+k)^{-2} \sigma^2 T_h T_h' \tau T_h' T_h + ((T_h T_h' - I)\gamma + T_h T_h' \tau A)((T_h T_h' - I)\gamma + T_h T_h' \tau A)' - (1+k)^{-2} ((T_h T_h' - (1+k)I)\gamma + T_h T_h' \tau A)((T_h T_h' - (1+k)I)\gamma + T_h T_h' \tau A)' + k^2(1+k)^{-2} T_h T_h' (\gamma + \tau A)(\gamma + \tau A)' T_h' T_h \right) X_*' + \delta \delta'$ ,  $\Re(A)$  stands for column space of  $A$  and  $A^{-1}$  is an independent choice of g-inverse of  $A$  and  $\theta = \delta + k(1+k)^{-1} X_* T_h T_h' (\gamma + \tau A)$ .

**Corollary C27:**

- a) If  $T_h T_h' \tau T_h' T_h$  is positive definite,  $\hat{y}_{SRrd}$  is superior to  $\hat{y}_{SRPCR}$  in MSEM sense when the regression model is misspecified due to excluding relevant variables if and only if
- $$\begin{aligned}
&2^{-2}(1+d)((T_h T_h' - 2(1+d)^{-1}I)\gamma + T_h T_h' \tau A)'(2^{-2}(3+d)(1-d)\sigma^2 T_h T_h' \tau T_h' T_h + \\
&((T_h T_h' - I)\gamma + T_h T_h' \tau A)((T_h T_h' - I)\gamma + T_h T_h' \tau A)')^{-1}(1+d)((T_h T_h' - 2(1+d)^{-1}I)\gamma + T_h T_h' \tau A) \leq 1
\end{aligned}$$

**Proof:** Consider  $D_{(i,j)} = D(\hat{y}_{SRPCR}) - D(\hat{y}_{SRrk}) = \sigma^2 T_h T_h' \tau T_h' T_h - 2^{-2}(1+d)^2 \sigma^2 T_h T_h' \tau T_h' T_h$

$$\begin{aligned}
&= \sigma^2 T_h T_h' (\tau - 2^{-2}(1+d)^2 \tau) T_h' T_h \\
&= \sigma^2 T_h T_h' 2^{-2}(3+d)(1-d) \tau T_h' T_h \\
&= 2^{-2}(3+d)(1-d) \sigma^2 T_h T_h' \tau T_h' T_h
\end{aligned}$$

Since  $0 < d < 1$  and  $\tau > 0$ .  $D_{(i,j)} > 0$  if  $T_h T_h' \tau T_h' T_h$  is positive definite. This completes the proof.

- b) If  $A \geq 0$ ,  $\hat{y}_{SRrd}$  is superior to  $\hat{y}_{SRPCR}$  in MSEM sense when the regression model is misspecified due to excluding relevant variables if and only if  $\theta \in \Re(A)$  and  $\theta' A^{-1} \theta \leq 1$ , where  $A = X_* \left( 2^{-2}(3+d)(1-d)\sigma^2 T_h T_h' \tau T_h' T_h + ((T_h T_h' - I)\gamma + T_h T_h' \tau A)((T_h T_h' - I)\gamma + T_h T_h' \tau A)' - 2^{-2}(1+d)^2 ((T_h T_h' - 2(1+d)^{-1}I)\gamma + T_h T_h' \tau A)((T_h T_h' - 2(1+d)^{-1}I)\gamma + T_h T_h' \tau A)' + 2^{-2}(1-d)^2 T_h T_h' (\gamma + \tau A)(\gamma + \tau A)' T_h' T_h \right) X_*' + \delta \delta'$ ,  $\Re(A)$  stands for column space of  $A$  and  $A^{-1}$  is an independent choice of g-inverse of  $A$  and  $\theta = \delta + 2^{-1}(1-d) X_* T_h T_h' (\gamma + \tau A)$ .

**Corollary C28:**

- a) If  $(k(1+d) + d - 1)T_h T_h' \tau T_h' T_h$  is positive definite,  $\hat{y}_{SRrk}$  is superior to  $\hat{y}_{SRrd}$  in MSEM sense when the regression model is misspecified due to excluding relevant variables if and only if
- $$\begin{aligned}
&(1+k)^{-2} ((T_h T_h' - (1+k)I)\gamma + T_h T_h' \tau A)' \left( 2^{-2}(1+k)^{-2} (k(1+d) + d + 3)(k(1+d) + d - 1) \sigma^2 T_h T_h' \tau T_h' T_h + 2^{-2}(1+d)^2 ((T_h T_h' - 2(1+d)^{-1}I)\gamma + T_h T_h' \tau A)((T_h T_h' - 2(1+d)^{-1}I)\gamma + T_h T_h' \tau A)' \right)^{-1} \\
&((T_h T_h' - (1+k)I)\gamma + T_h T_h' \tau A) \leq 1
\end{aligned}$$

**Proof:** Consider  $D_{(i,j)} = D(\hat{y}_{SRrd}) - D(\hat{y}_{SRrk}) = 2^{-2}(1+d)^2 \sigma^2 T_h T_h' \tau T_h' T_h - (1+k)^{-2} \sigma^2 T_h T_h' \tau T_h' T_h$

$$\begin{aligned}
&= \sigma^2 T_h T_h' (2^{-2}(1+d)^2 - (1+k)^{-2}) \tau T_h' T_h \\
&= \sigma^2 T_h T_h' 2^{-2} (k(1+d) + d + 3)(k(1+d) + d - 1)(1+k)^{-2} \tau T_h' T_h
\end{aligned}$$



$$= 2^{-2}(1+k)^{-2}\sigma^2(k(1+d)+d+3)(k(1+d)+d-1)T_h T_h' \tau T_h' T_h$$

Since  $0 < d < 1$ ,  $k > 0$  and  $\tau > 0$ .  $D_{(i,j)} > 0$  if  $(k(1+d)+d-1)T_h T_h' \tau T_h' T_h$  is positive definite.

This completes the proof.

- b) If  $A \geq 0$ ,  $\hat{y}_{SRrk}$  is superior to  $\hat{y}_{SRrd}$  in MSEM sense when the regression model is misspecified due to excluding relevant variables if and only if  $\theta \in \Re(A)$  and  $\theta' A^{-1} \theta \leq 1$ , where  $A = X_* \left( 2^{-2}(1+k)^{-2}\sigma^2(k(1+d)+d+3)(k(1+d)+d-1)T_h T_h' \tau T_h' T_h + 2^{-2}(1+d)^2 \left( (T_h T_h' - 2(1+d)^{-1}I)\gamma + T_h T_h' \tau A \right) \left( (T_h T_h' - 2(1+d)^{-1}I)\gamma + T_h T_h' \tau A \right)' - (1+k)^{-2} \left( (T_h T_h' - (1+k)I)\gamma + T_h T_h' \tau A \right) \left( (T_h T_h' - (1+k)I)\gamma + T_h T_h' \tau A \right)' + 2^{-2}(1+k)^{-2} \left( (1+d)(1+k) - 2 \right)^2 T_h T_h' (\gamma + \tau A) (\gamma + \tau A)' T_h' T_h \right) X_*' + \delta \delta'$ ,  $\Re(A)$  stands for column space of  $A$  and  $A^{-1}$  is an independent choice of g-inverse of  $A$  and  $\theta = \delta + 2^{-1}(1+k)^{-1}((1+d)(1+k) - 2)X_* T_h T_h' (\gamma + \tau A)$ .
